# Supplementary material for: Flexible covalent organic framework membranes with linear aliphatic amines for enhanced organic solvent nanofiltration
Source: Royal Society of Chemistry journal article supplement (doi:10.1039/d3ta02683c), 2023-01-01
Supplement: d3ta02683c1.pdf [file d3ta02683c1.pdf]

## Supplementary Information

### Flexible Covalent Organic Framework Membranes with Linear Aliphatic amines for Enhanced Organic Solvent Nanofiltration

Biswajit Mishra and Bijay P Tripathi\*

Functional Materials & Membranes Laboratory, Department of Materials Science and Engineering, Indian Institute of Technology Delhi, Hauz Khas, New Delhi, 110016, India.

Corresponding Author Email: [bpatripathi@mse.iitd.ac.in](mailto:bpatripathi@mse.iitd.ac.in); [drbpatripathi@gmail.com](mailto:drbpatripathi@gmail.com)

#### Table of contents

| Section |                                                                    | Page no. |
|---------|--------------------------------------------------------------------|----------|
| S1      | Materials, methodologies, and instrumentation                      | S2       |
| S2      | Solid state <sup>13</sup> C NMR of TFG-EDA, TFG-DETA, and TFG-TETA | S12      |
| S3      | Morphological analysis                                             | S13      |
| S4      | FTIR of COF membranes                                              | S14      |
| S5      | X-ray photoelectron spectroscopy analysis                          | S15      |
| S6      | BET summary                                                        | S16      |
| S7      | TGA analysis                                                       | S13      |
| S8      | PXRD of COF membranes                                              | S17      |
| S9      | Static BSA adsorption test                                         | S20      |
| S10     | Additional information about Atomic force microscopy               | S21      |
| S10     | Molecular weight cut-off analysis                                  | S22      |
| S11     | Additional information for OSN performance                         | S23      |
| S12     | Dynamic antifouling performance                                    | S30      |
| S13     | Structural Modelling and refinement of COFs                        | S31      |
| S14     | References                                                         | S41      |

## **S1. Materials, methodologies, and instrumentation**

### **S1.1. Materials**

Phloroglucinol, trifluoroacetic acid, and hexamethylene tetramine were purchased from TCI, Japan. 1,3,5-triphlorofluoroglucinol was prepared using previously reported literature, and the purity was confirmed using NMR ( $^1\text{H}$  and  $^{13}\text{C}$ ) and FTIR. Ethylene diamine (EDA), diethylene triamine (DETA), triethylene tetraamine (TETA), acetic acid, and all other solvents/chemicals were procured from Sigma-Aldrich (USA) and used as received. Methylene blue, Congo red, crystal violet, brilliant blue, and all solvents were purchased from CDH (P) Ltd. India. The polyethylene terephthalate (PET) track etched microporous membranes (pore size = 0.20  $\mu\text{m}$ , pore density =  $5 \times 10^8$  pores  $\text{cm}^{-2}$ ) were acquired from it4ip, Belgium. Prior to interfacial polymerization, PET membranes were thoroughly washed with isopropanol/water to remove any impurities. For all experimental purposes, Millipore deionized water was used.

### **S1.2. Methodologies**

#### ***S1.2.1. Synthesis of 1,3,5-triphlorofluoroglucinol (TFG)***

TFG was synthesized according to a literature procedure with slight modifications.<sup>1</sup> Initially, 36 mmol of hexamethylenetetramine and 16.33 mmol of phloroglucinol were mixed in a two-necked round bottom flask under an  $\text{N}_2$  environment. The mixture was purged with  $\text{N}_2$  for 30 minutes, after which 33 mL of trifluoroacetic acid was slowly added dropwise while vigorously stirring. The resulting solution was then heated at 100°C for 2.5 h under an  $\text{N}_2$  atmosphere. After that, 100 mL of 3M HCl was added to the reaction mixture and stirred for another hour at 100 °C. The solution was then cooled, filtered through celite, and extracted with dichloromethane. Anhydrous magnesium sulfate was added to the DCM solution and stirred overnight to remove trace amounts of water. Finally, the solution was filtered, and the resulting off-white product was obtained by rotary evaporation. The product was confirmed using NMR and FTIR and stored at 4 °C.

#### ***S1.2.2. Synthesis of COF thin film over porous support via interfacial polymerization***

COF nanofilms were fabricated on a porous PET support membrane using an interfacial polymerization technique with a similar concentration of all monomers, catalysts, and solvents. The thickness of the COF layer was optimized by adjusting the interfacial polymerization time.

Prior to interfacial polymerization, the PET membrane was treated with 1 wt% PVA to improve the interaction of the COF layer with the support membrane. The PET membranes were placed on a custom-made stainless-steel plate using double-sided adhesive tape (**Figure S2**). The COF thin film was prepared in a 250 mL beaker at room temperature. Briefly, 0.045 mmol of Scandium triflate was added into 50 mL of an aqueous phase (**Solution A**) and poured onto the support membrane. In another beaker, 0.3 mmol of TFG was mixed in 47.5 mL of xylene and 2.5 mL of DCM and stirred gently to obtain a clear solution (**Solution B**). Then, 0.45 mmol of diamine was added to solution B and stirred for 120 sec, resulting in a turbid yellowish solution. Solution B was then slowly poured into the aqueous phase using a funnel without disturbing the mixture. The beaker was covered with a glass plate to avoid airflow and kept undisturbed during polymerization. After different intervals of polymerization time, the stainless-steel plate was lifted upward to transfer the COF film to the porous PET support. The fabricated COF membrane was thoroughly washed with DMAC, water, and ethanol, followed by ambient drying at 35 °C and vacuum drying at 45 °C. The resulting membrane over support was denoted as TFG-EDA. Similarly, TFG-DETA and TFG-TETA were prepared using a similar approach but with different diamines, such as DETA and TETA. To obtain a self-standing COF film, interfacial polymerization was conducted for 72 h, followed by washing with DMAC, water, and ethanol and vacuum drying at 35 °C for 24 h.

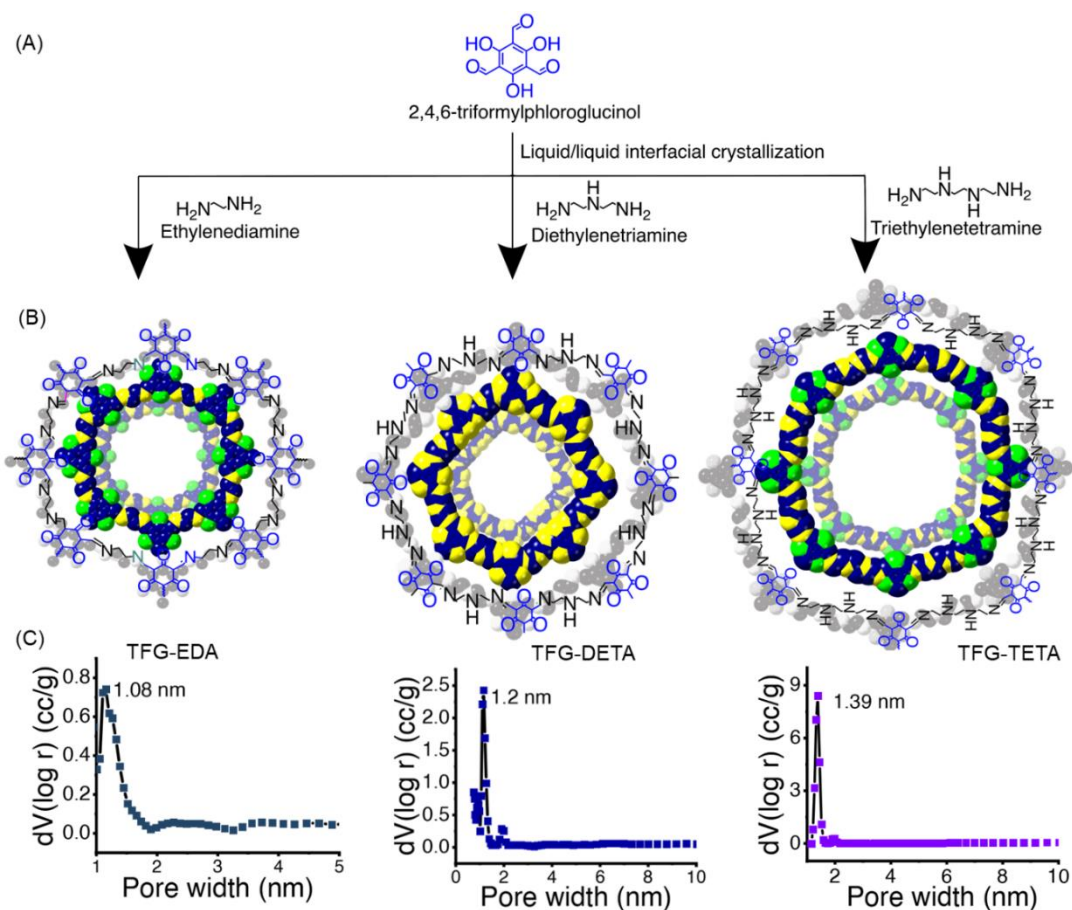

**Figure S1**| Schematic representation of COFs using different diamine monomers (A), Chemdraw and modelled structures of all COFs (B), pore-size distribution of corresponding COF membranes (C).

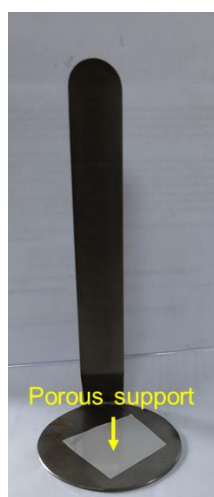

**Figure S2**| Fabricated stainless-steel plate for transferring the COF nanofilm to the porous substrate after interfacial polymerization.

### *S1.2.2 (a) Control of COF film thickness*

The thickness of the COF film can be controlled by varying several parameters, including monomer concentration, polymerization time, etc. Herein, we regulated the COF layer thickness by changing the interfacial polymerization time. The detailed synthesis conditions are discussed in the previous section. For instance, after adding the organic phase to an aqueous solution, instantly within 15 min of polymerization, an ultrathin film appeared at the interface. In the initial stages, the film was mechanically unstable. Therefore we allowed a longer polymerization time to achieve a defect-free large-area COF membrane over the polymeric membrane support. To assess the effect of polymerization time, the COF layer was transferred to the PET support at different time intervals, and FESEM cross-sectional analysis was performed to measure the film thickness. As observed in **Figure S3**, all the COF membrane exhibits ~55 nm of thickness with a polymerization time of 30 min. At 120 min of polymerization time, the thickness of TFG-EDA, TFG-DETA, and TFG-TETA was found to be  $116\pm 4$ ,  $120\pm 5$ , and  $115\pm 6$  nm, respectively. The mean roughness of the TFG-EDA, TFG-DETA, and TFG-TETA layers is  $42\pm 6$ ,  $37\pm 3$ , and  $44\pm 4$  nm, respectively. The results of our study indicate the control of COF thickness and roughness by tuning the polymerization time, which can be applied to similar kinds of COF film preparation for future research.

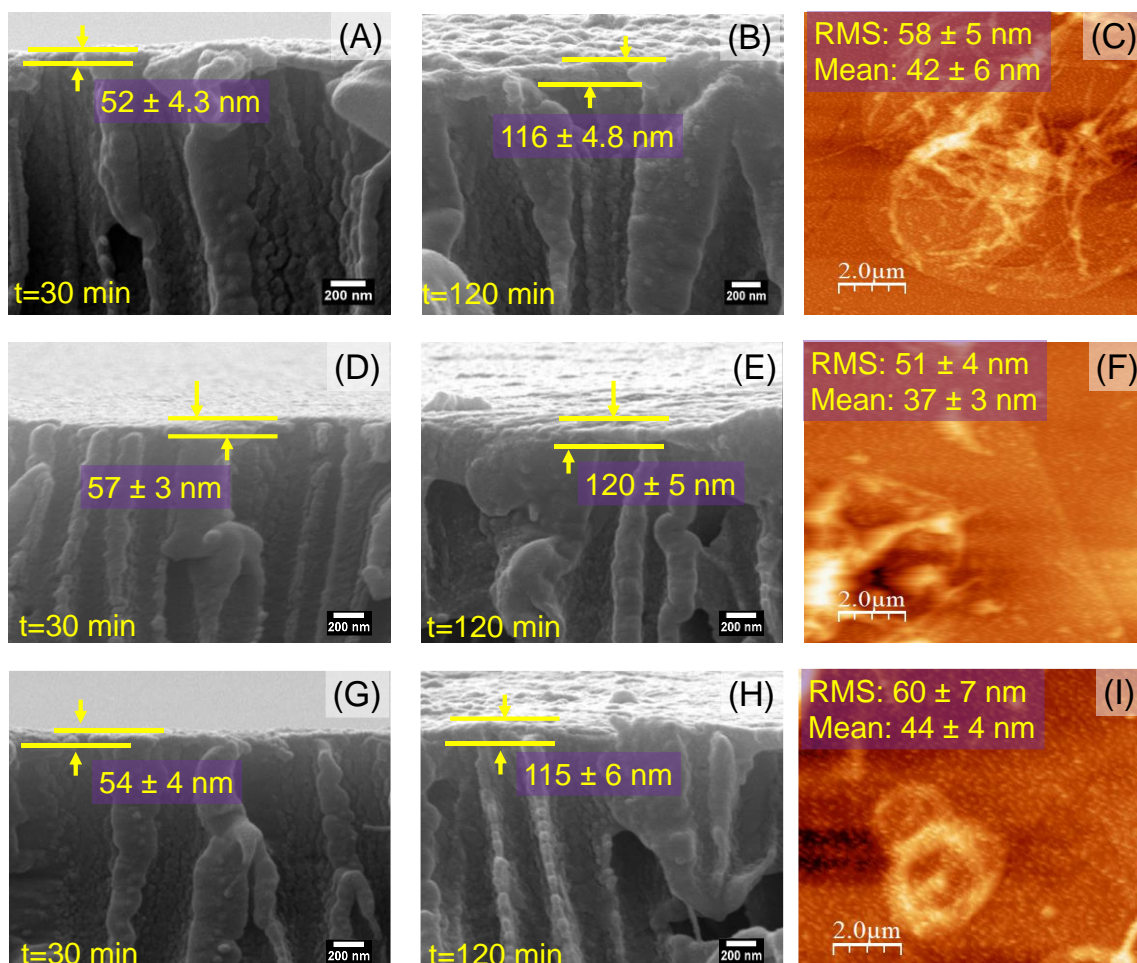

**Figure S3| Effect of interfacial polymerization time on COF layer thickness and roughness.** FESEM cross-sectional images of (A, B) TFG-EDA membrane, (D, E) TFG-DETA, and (G, H) TFG-TETA membrane. AFM images of (C) TFG-EDA, (F) TFG-DETA, and (I) TFG-TETA membranes.

### **S1.2.2 (b) Structural modelling of COF using Materials Studio.**

The structural modelling of TFG-EDA, TFG-DETA, and TFG-TETA COFs was carried out using the Materials Studio 2020 software package (Accelrys Software Inc.).<sup>4</sup> In the present study, the Primitive (P1) space group was used for all the eclipsed (AA) stacked mode of COF structures. The structures were optimized using the Forcite model with Universal force field before the refinement, and the refinement was done using the Pawley method with the experimental PXRD pattern using the Reflex module using previously reported studies.<sup>5</sup> The 2-theta range was set from 2 to 40° with a step size of 0.02°. The structural refinement results are illustrated in **Figure 3(A-C)**, **Figure S13** and the final fractional atomic coordinates is summarised in **Table S1-S3**.

### **S1.3. Instrumentation and Methods**

#### ***Fourier transform infrared (FT-IR) spectroscopy:***

The FTIR spectra of the COF membranes were obtained using the Nicolet IR 6700 spectrometer (Thermo Fisher Scientific, USA) via the attenuated total reflectance (ATR) method.

#### ***Powder X-ray diffraction analysis and structural refinement:***

The powder X-ray diffraction (PXRD) spectra of purified COF powder samples were obtained using the Rigaku Ultima instrument with a 2-40° range, with a step size of 0.02°.

#### ***X-ray photoelectron spectroscopy:***

The surface elemental composition of the COF membranes was analyzed using the Thermofischer scientific Nexsa G2 X-Ray photoelectron spectrometer. XPS samples were prepared by mounting the COF film on a silicon wafer.

#### ***Small-angle X-ray scattering:***

Small-angle X-ray scattering (SAXS) measurements were performed on the SAXS point 2.0 (Anton Parr) equipped with a Primux 100 micro microfocus Cu X-ray source. The sample-to-detector distance was kept at 1.07 m for analysis. A dense sample layer was packed in a powder cell for the SAXS analysis, and the measurements were done under vacuum at ca. 1 mbar. Using the SAXSanalysis 4.20 software, we converted the 2D scattering images into 1D radial intensity profiles (Anton Paar). The collected SAXS data were corrected for transmission, dark current, and background and averaged azimuthally as a function of the scattering vector  $q$ , where  $q = 4\pi\lambda^{-1} \sin(\theta)$ . The  $\theta$  and  $\lambda$  are the scattering angle and the incident X-ray wavelength, respectively.

#### ***Atomic force microscopy:***

The three-dimensional topography of COF membranes was measured with a hpAFM Asylum Research (MFP3D-BIO, Oxford Instruments, U.K.) in tapping mode, using a gold-coated silicon nitride tip. The COF film was carefully transferred to a silicon wafer, and a scratch was made with a sharp blade for measuring the thickness of the COF film at different interfacial polymerization times. For AFM-based nanoindentation experiments, a silicon-based AFM probe (ContAl-G) with resonant frequency of 13 kHz and a force constant of 0.2 N/m was used.

The force-displacement responses were recorded and examined during the approach and withdrawal stages.

### ***Scanning/transmission electron microscopy***

Scanning electron microscopy was performed using JSM-7800F (JEOL, Japan) instrument equipped with an EDS detector. The dried membranes were mounted on copper tape and coated with platinum for 60 s using a sputter coater. High-resolution transmission electron microscopy (HRTEM) was performed using a JEM-ARM200F NEOARM (JEOL, Japan) instrument with an accelerating voltage of 200 V. The dried samples were dispersed and mounted over a carbon-coated copper grid.

### ***BET analysis***

For the BET analysis, free-standing films (72 h) were fabricated, filtered, and repeatedly washed with DMAc, acetone, and ethanol. The dried film powder was further purified using a Soxhlet extractor with ethanol. Finally, N<sub>2</sub> adsorption/desorption analysis was performed using Autosorb iq4 (Quantachrome instruments). The sample was degassed at 437 K for 360 min, and the N<sub>2</sub> adsorption/desorption isotherm was collected at 77 K. The surface areas of COFs were determined by applying the Brunauer-Emmett-Teller (BET) model between P/P<sub>0</sub> values of 0.04 and 0.25. The related pore size distributions were calculated using the non-local density functional theory (NLDFT) method using the ASiQwin software.

### ***Thermogravimetric analysis***

Thermogravimetry analysis of COF samples were performed on a Thermal analyzer (TA instruments) with a ramp rate of 10 °C min<sup>-1</sup> from 25 °C to 750 °C to analyze their thermal stability.

### ***Zeta potential***

Zeta potential was measured to analyze the charge nature on the surface of COF membranes at different pH values ranging from 2 to 9. The measurements were performed on a Surpass 3 Electrokinetic analyzer (Anton Paar GmbH, Graz, Austria) using an adjustable gap cell.



### ***Contact angle measurement***

The surface wettability of COF membranes was analyzed by measuring the static water contact angle on a Drop shape analyzer DSA100 (KRÜSS GmbH, Germany) at ambient temperature.

### ***Protein adsorption study***

Protein adsorption onto COF membranes was studied using BSA as a model foulant in a phosphate-buffered saline (PBS, pH 7.4) solution. Briefly, a square piece of membrane (1 cm<sup>2</sup>) was immersed in the PBS solution and stirred gently for overnight. The soaked membranes were then dipped into a 1 mg mL<sup>-1</sup> BSA solution and shaken for 4 h at room temperature. Subsequently, the membranes were removed and thoroughly washed with fresh PBS. The BSA adsorption was quantified using a microplate reader (Synergy H1) to measure residual and wash solution using the Bradford Assay technique.<sup>2</sup> The BSA adsorption capacity was calculated using the following equation,

$$\text{BSA adsorption capacity } (\mu\text{g cm}^{-2}) = \frac{C_0 - C_f}{A} \quad (\text{S1})$$

where  $C_0$  and  $C_f$  is the initial and final concentration of BSA. For direct visualization of protein on the membrane surface, an albumin–fluorescein isothiocyanate conjugate (FITC-BSA; Sigma Aldrich) adsorption test was performed. A FITC-BSA solution (0.05 mg mL<sup>-1</sup>) was prepared in PBS (pH 7.4), and the membrane coupons were immersed and kept in the dark under gentle shaking conditions for 4 h. Subsequently, the membrane was removed and washed with fresh PBS solution. After that, the membrane was adhered to a microscopic glass slide, and fluorescence imaging was performed using a fluorescence microscope (Leica instruments).

### ***Organic solvent nanofiltration performance and long-term OSN performance***

Organic solvent nanofiltration (OSN) experiments were performed using a stainless-steel dead-end filtration set up with an effective filtration area of 15.18 cm<sup>2</sup>. The operational pressure was controlled by using a N<sub>2</sub> gas cylinder, and all the filtration performances were conducted under ambient conditions. Prior to interfacial polymerization, the support PET membranes were cut to match the diameter of the filtration area, and the interfacial films were transferred onto the support membrane surface. Pure water and organic solvent permeance (L m<sup>-2</sup> h<sup>-1</sup> bar<sup>-1</sup>) were measured with various solvents, including methanol, ethanol, isopropanol, hexane, DMF, and

acetone. All permeation data were calculated after achieving steady-state filtration, typically after 30 min of filtration. The pure solvent flux was calculated using the following equation:

$$\text{Solvent permeance } (L m^{-2} h^{-1} bar^{-1}) = V_p / A_m \Delta t \Delta p \quad (S2)$$

where,  $V_p$  is the permeation volume,  $A_m$  is the effective membrane area,  $\Delta t$  is the filtration time, and  $\Delta p$  is the applied nitrogen pressure.

After solvent permeation studies, the reservoir was filled with different dye solutions to evaluate the dye rejection performance of COF membranes. In our study, we used 4-nitrophenol, Methylene blue, orange G, Rhodamine B, Congo red, and Brilliant blue dyes. Finally, the test solution was filtered through the membrane, and the permeates and retentates were collected to quantify the rejection performance. The solute rejection percentage was calculated using the given equation:

$$\text{Solute rejection } (\%) = \left(1 - \frac{C_p}{C_f}\right) \times 100 \quad (S3)$$

where,  $C_p$  and  $C_f$  is the permeate and feed concentration of dye. The feed, retentate, and permeate concentrations were measured using a UV-visible spectrophotometer. Unless specified, all the OSN experiments were carried out at least three to four times for individual samples.

The molecular weight cut-off (MWCO) of COF membranes was determined using neutral PEG molecules of different molecular weights (200, 400, 600, 800, 1000, and 2000 Da) in water ( $0.5 \text{ g L}^{-1}$ ). After the filtration test, the filtrates were collected and treated with a 5%  $BaCl_2$  solution and a 0.05 M iodine solution. The UV absorbance of the treated filtrates was quantified at 590 nm using a microplate reader (Synergy H1, Biotek, USA), and the concentration of PEG was determined with a standard curve comprised of PEGs that were identical to the PEGs being measured. The percentage of rejection was calculated using **equation S3**. The PEG rejection data were further used to evaluate the pore size and the pore size distribution of the COF membranes. The relationship between Stokes diameter ( $D_p$ ) and molecular weight ( $M_w$ ) of PEG solute is given below.<sup>3</sup>

$$\text{Stoke diameter } (D_p) = 33.46 \times 10^{-12} \times M_w^{0.557} \quad (S4)$$

Additionally, a lognormal distribution curve was produced in order to acquire the pore size distribution of membranes based on the PEG rejection data. The following probability density

function equation can be used to estimate the pore size distribution and the mean pore diameter (equation S5):

$$\frac{dR(r_p)}{dr_p} = \frac{1}{\sqrt{2\pi} r_p \ln\sigma_p} \exp\left\{-\frac{(\ln r_p - \ln\mu_p)^2}{2(\ln\sigma_p)^2}\right\} \quad (\text{S5})$$

where,  $\mu_p$  is the mean pore effective pore size, and  $\sigma_p$  is the geometrical standard deviation which can be calculated by dividing the rejection ratio at 84.13% and 50%. Similarly, BSA rejection was done to evaluate the antifouling performance of membranes.

### ***Dynamic membrane fouling***

To antifouling performance of COF membranes was evaluated by filtering a BSA solution (in PBS at pH 7.4, g mg/mL) in three steps: pure water filtration ( $J_{wi}$ ), BSA filtration ( $J_{BSA}$ ), and filtration of pure water after BSA filtration ( $J_{wr}$ ). After the BSA filtration test, the membranes were rinsed with pure water to check the flux recovery using the following equation:

$$\text{flux recovery (\%)} = \frac{J_{wf}}{J_{wi}} \times 100 \quad (\text{S6})$$

Furthermore, the reversible fouling and irreversible fouling were calculated to understand the antifouling mechanisms using the following equations,

$$\text{Reversible fouling (R}_r\text{)} = \frac{J_{wr} - J_{BSA}}{J_{wi}} \quad (\text{S7})$$

$$\text{Irreversible fouling (R}_{ir}\text{)} = \frac{J_{wi} - J_{wr}}{J_{wi}} \quad (\text{S8})$$

where  $J_{wi}$  is the initial flux,  $J_{wr}$  is the recovered flux, and  $J_{BSA}$  is the flux during BSA filtration

S2: Solid state  $^{13}\text{C}$  NMR of TFG-EDA, TFG-DETA, and TFG-TETA

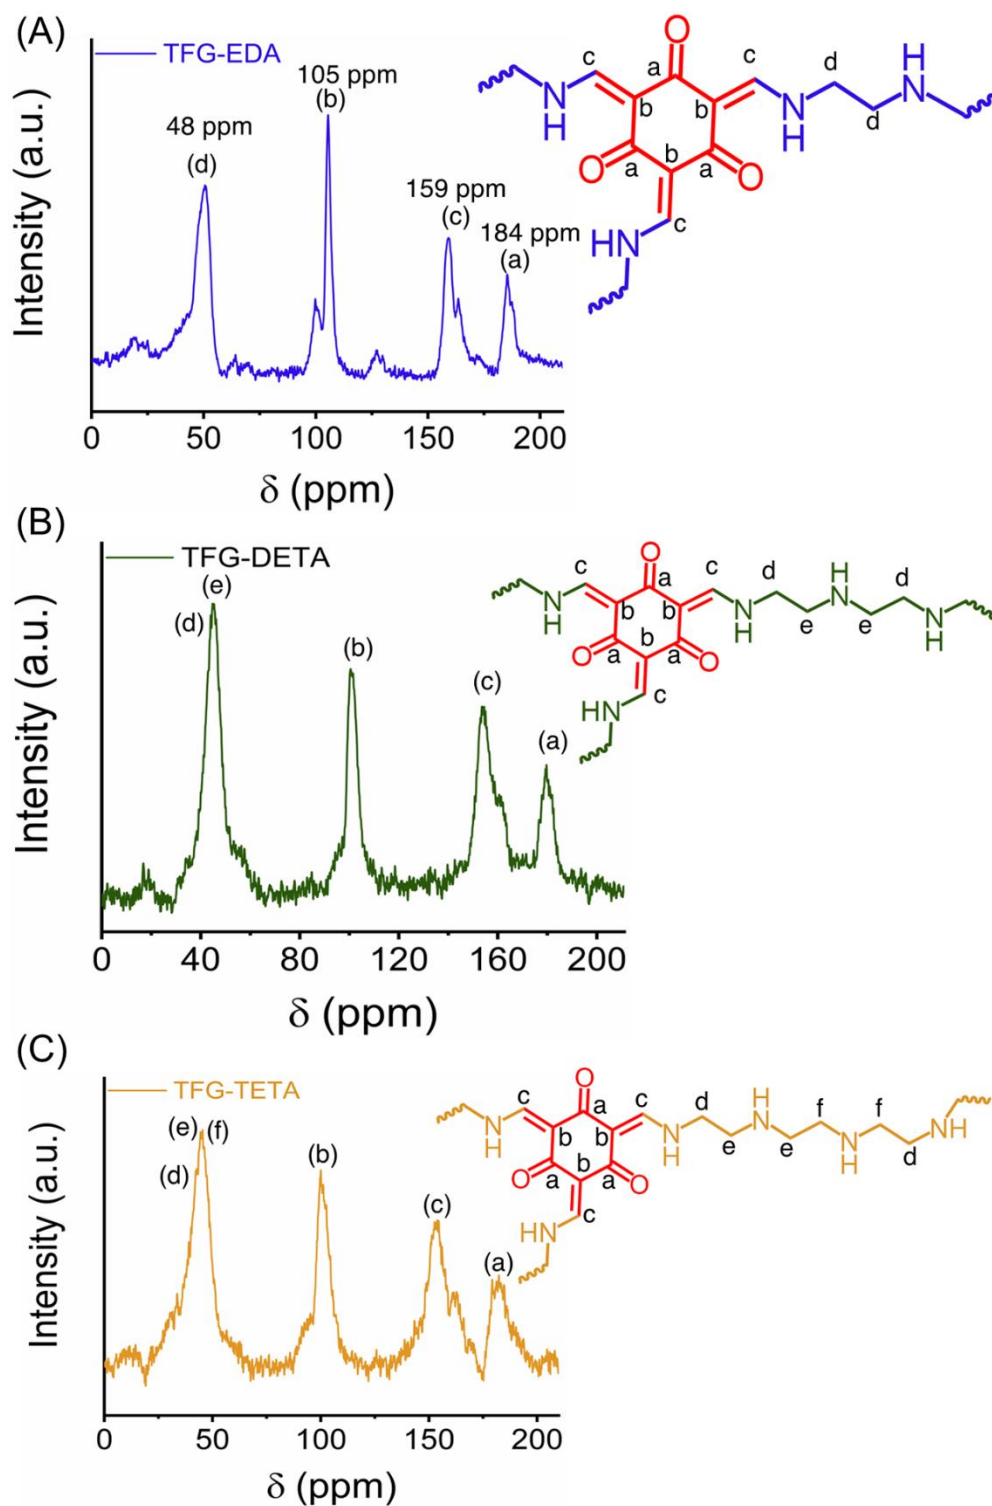

**Figure S4** |  $^{13}\text{C}$  CP-MAS spectra of (A) TFG-EDA, (B) TFG-DETA, and (C) TFG-TETA COFs.

### S3: Morphological analysis

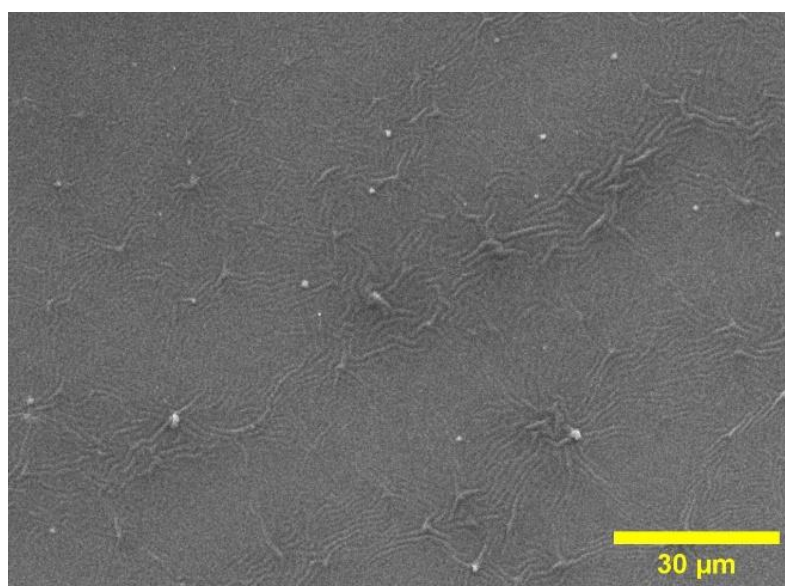

**Figure S5|** Low magnification FESEM image of large area TFG-EDA membrane.

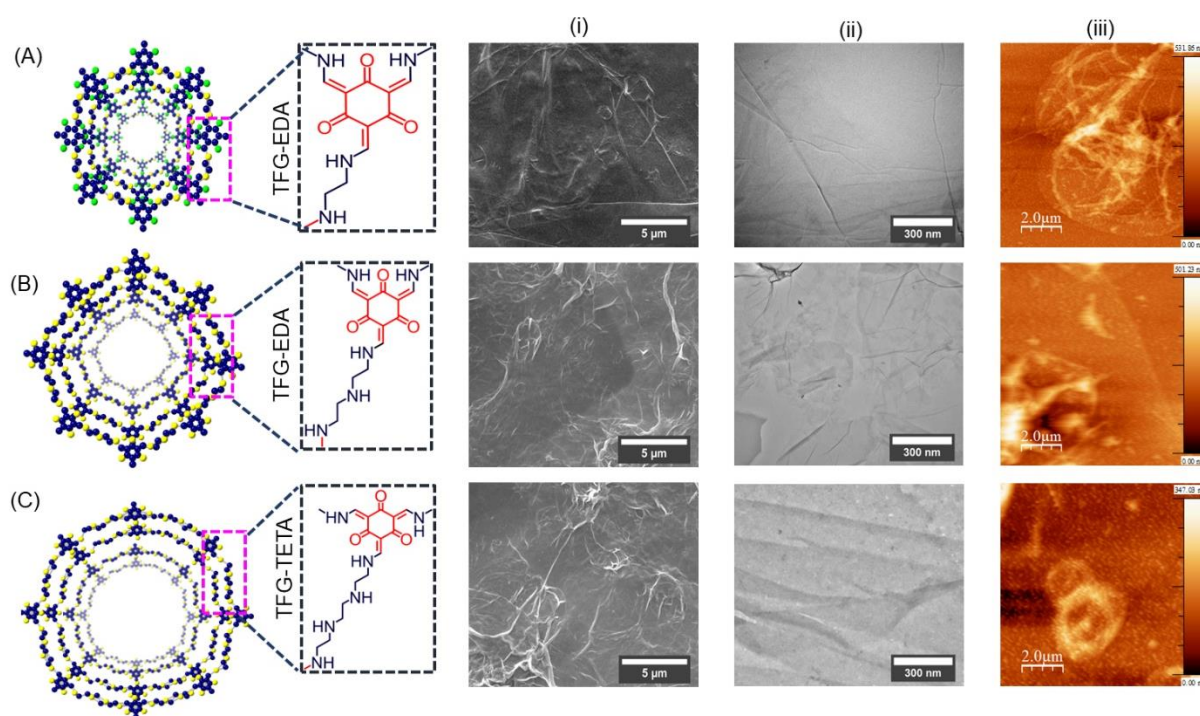

**Figure S6| Characterization** of COF membranes. Schematic structure of synthesized COF structures (A) TFG-EDA, (B) TFG-DETA, (C) TFG-TETA, (i) FESEM, (ii) TEM, and (iii) AFM images of the corresponding COF membranes.

#### S4: FTIR of COF membranes

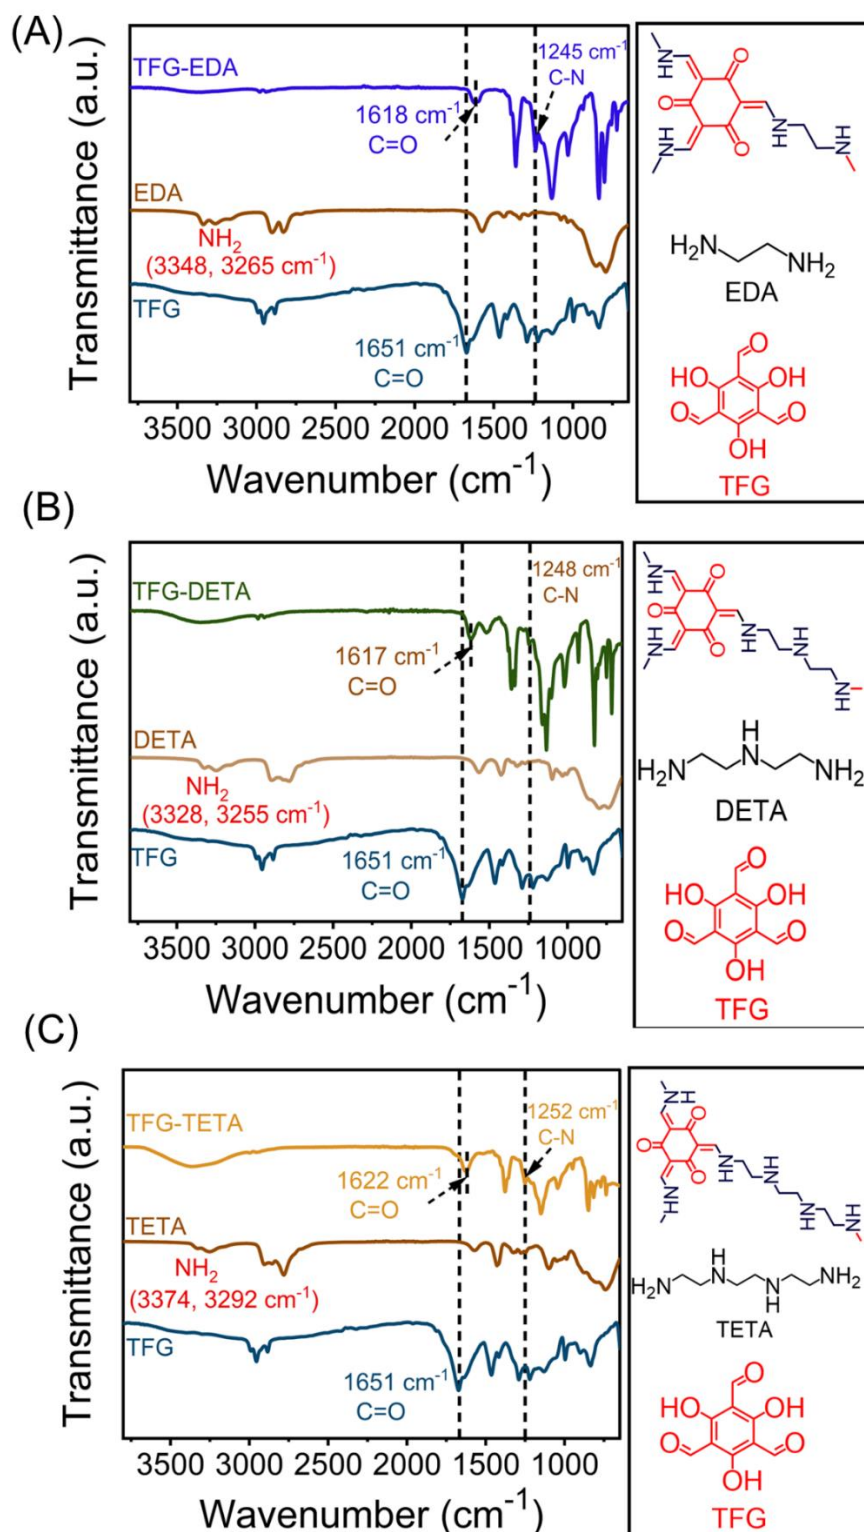

**Figure S7** | FTIR spectra of interfacially crystallized COF membranes (A) TFG-EDA, (B) TFG-DETA, and (C) TFG-TETA.

## S5. X-Ray photoelectron spectroscopy analysis

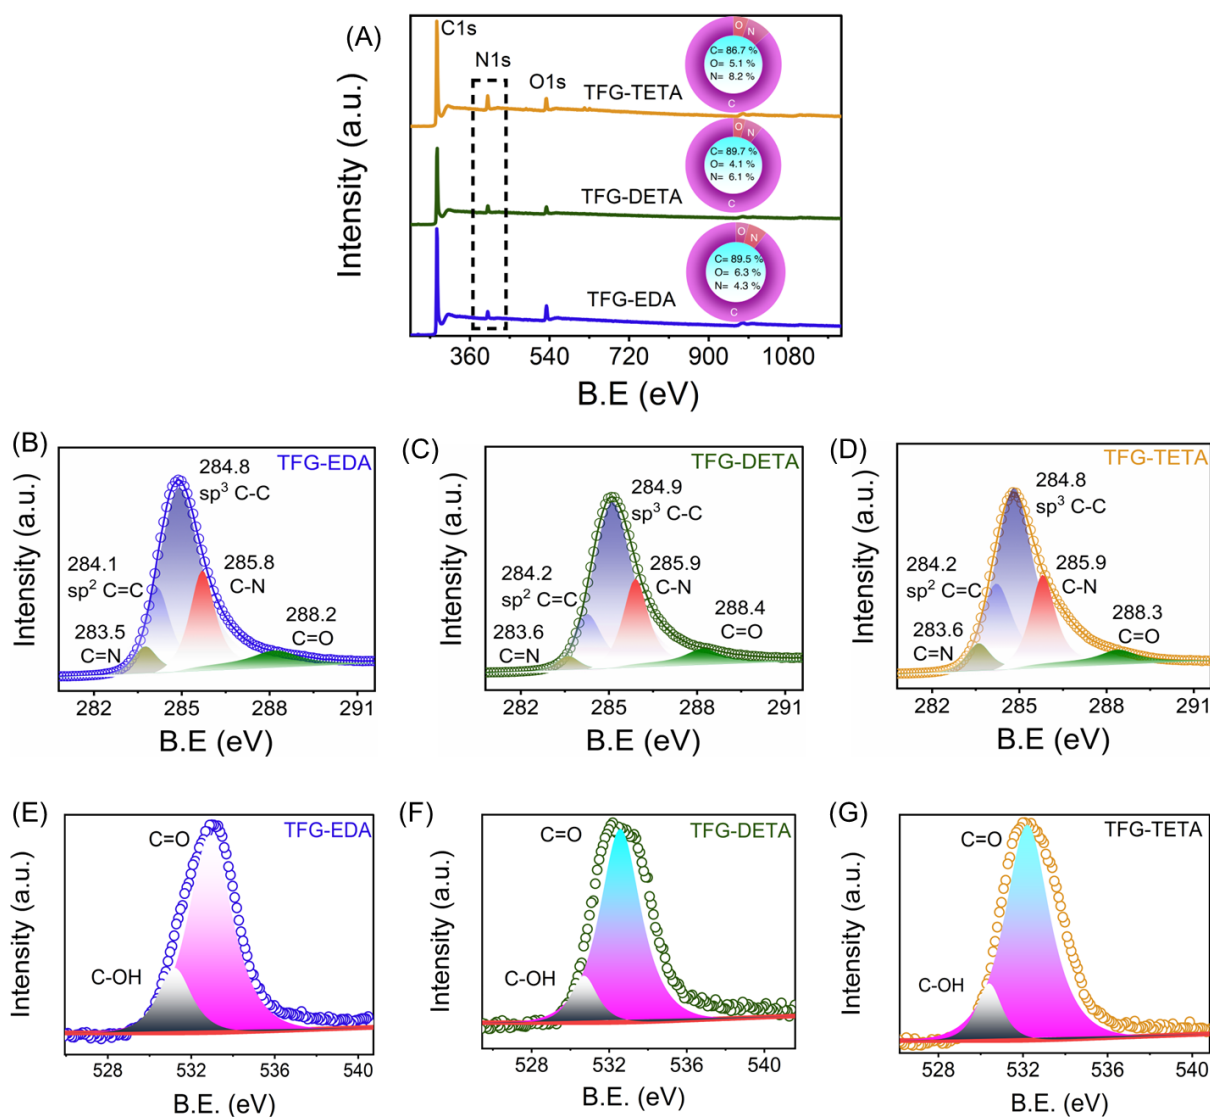

**Figure S8** | High-resolution X-ray photoelectron spectra of COF membrane, (A) survey spectra (inset pie chart shows the elemental composition), (B-D) deconvoluted C1s spectra, (E-G) deconvoluted O1s spectra of TFG-EDA, TFG-DETA, and TFG-TETA.

**S6: BET summary**

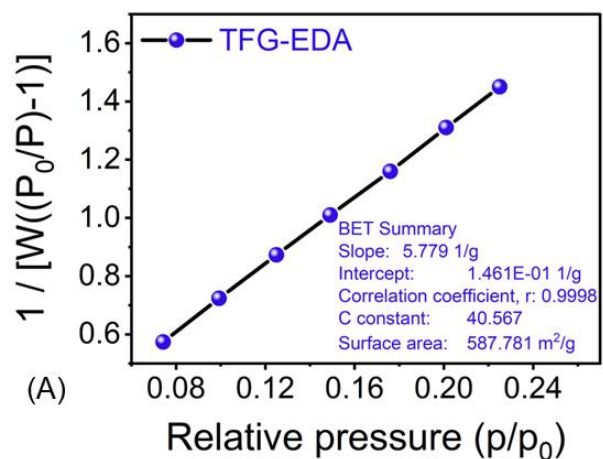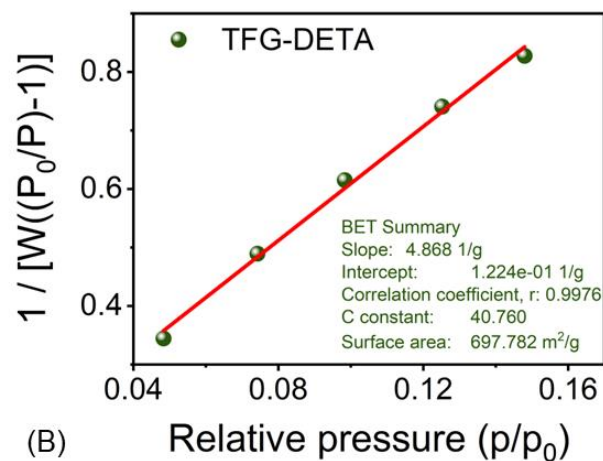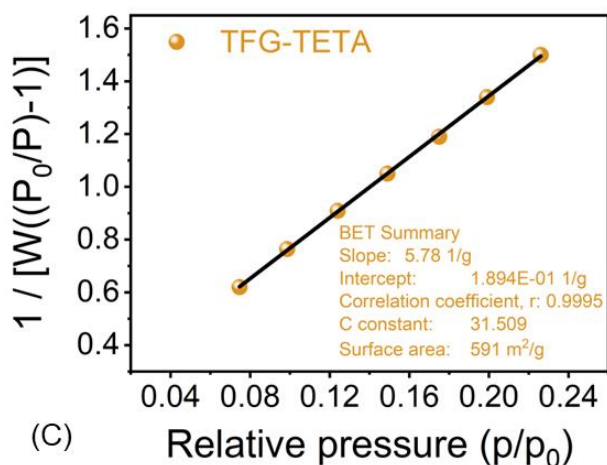

**Figure S9** | Plots of the linear region for the BET equation for (A) TFG-EDA, (B) TFG-DETA, and (C) TFG-TETA.



### S7. TGA analysis

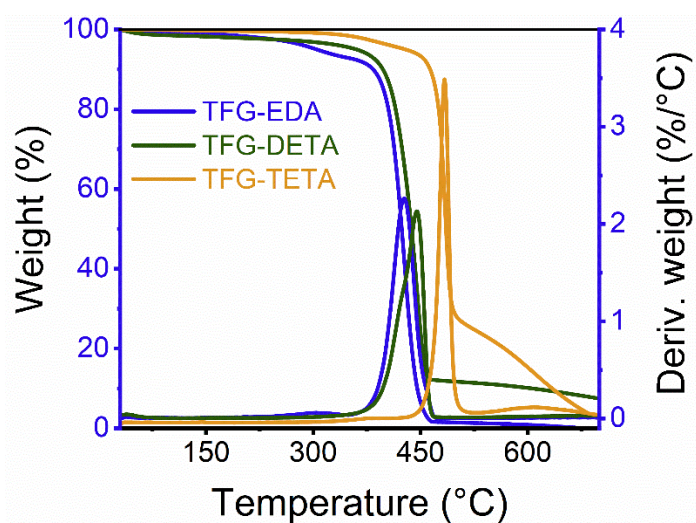

**Figure S10** | Thermogravimetry analysis of TFG-EDA, TFG-DETA, and TFG-TETA thin films

### S8: PXRD of COF membrane

#### S8.1: PXRD of COF membrane over the support

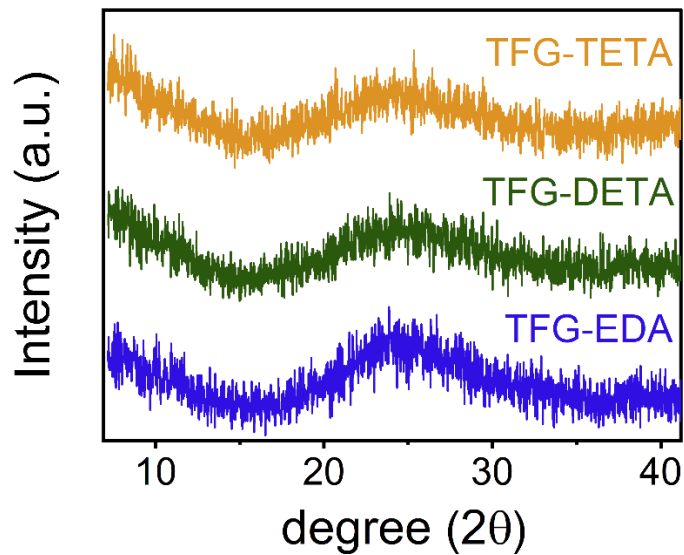

**Figure S11** | XRD of COF films obtained after interfacial polymerization of 120 min

## S8.2. Effect of interfacial polymerization time on crystallinity

To study the effect of interfacial polymerization time on the COF crystallization process, we performed the XRD at different polymerization times. We observed a broadening in XRD spectra when the COF membrane mounted over polymeric support as the polymeric supports peak mainly interfered with the COF spectra. Therefore, we have collected the XRD spectra by mounting the COF membrane sample over a zero background sample holder (Malvern Panalytical). This requires minimal sample quantity and provides a better XRD pattern without background interference. From the XRD spectra, it can be postulated that the formation of a well-crystalline COF predominantly depends on the polymerization time. No noticeable PXRD spectra were detected in the initial phase of polymerization up to 60 min. However, after 120 min of interfacial polymerization, the XRD pattern demonstrated two diffraction peaks at  $\sim 3.7^\circ$  and  $26^\circ$ , corresponding to (100) and (001) reflection planes from the COF, confirming the formation of crystalline COF at the interface.

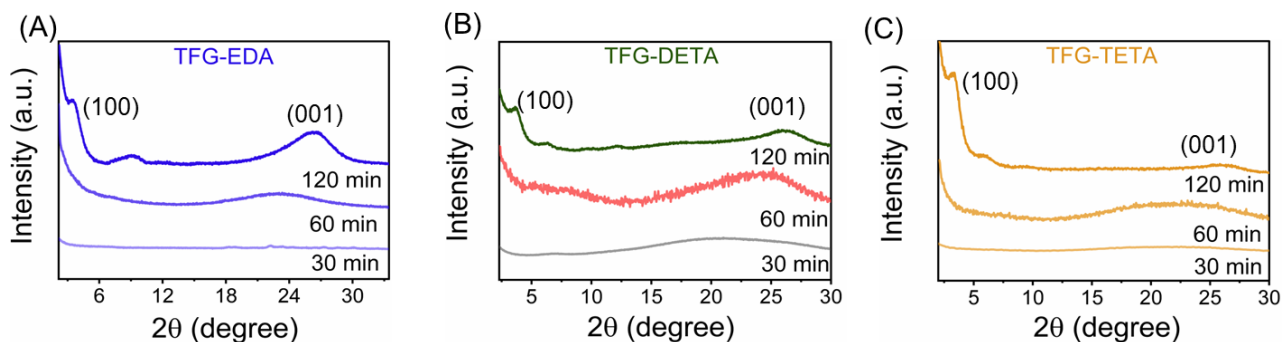

**Figure S12** XRD spectra of (A) TFG-EDA, (B) TFG-DETA, and (C) TFG-TETA COF films obtained at different interfacial polymerization times.

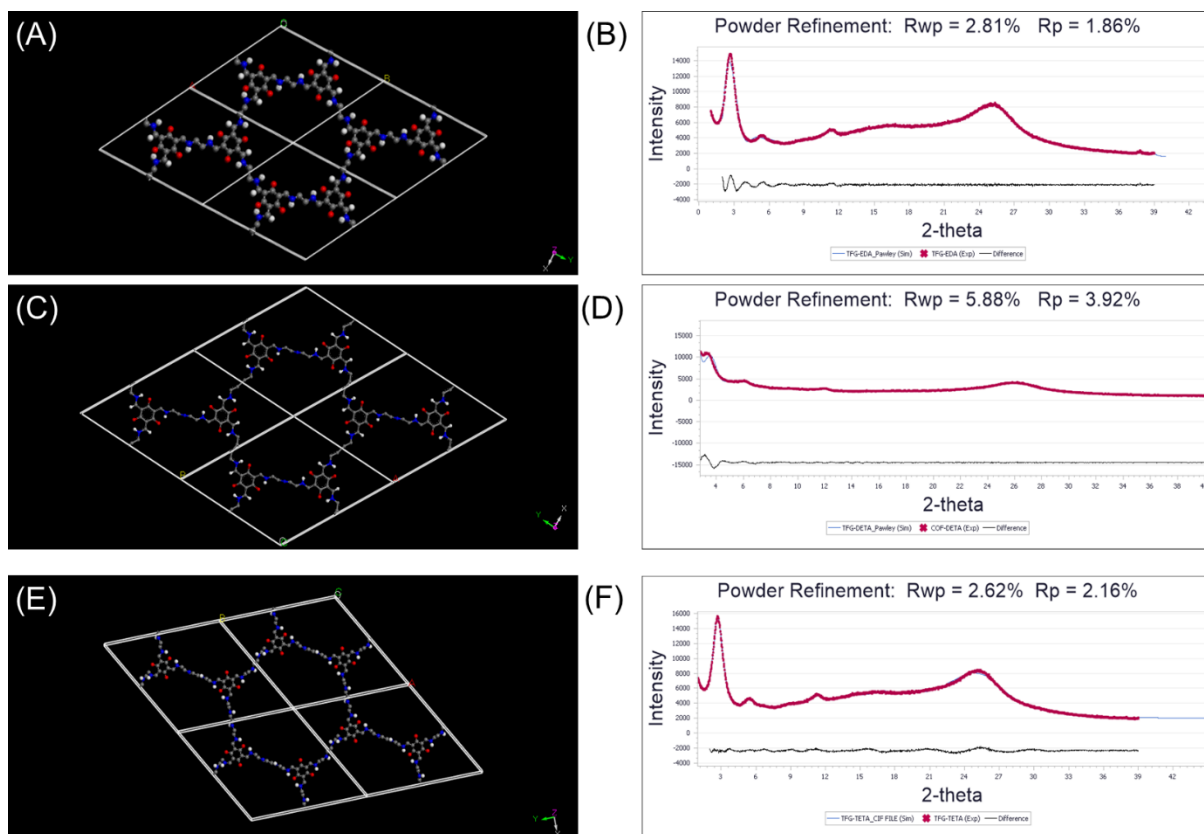

**Figure S13** Eclipsed crystal lattice packing of (A)TFG-EDA, (C)TFG-DETA (E)TFG-TETA and PXRD refinement using Pawley method of (B)TFG-EDA, (D)TFG-DETA and (F)TFG-TETA membranes.

### S9: Static BSA adsorption test

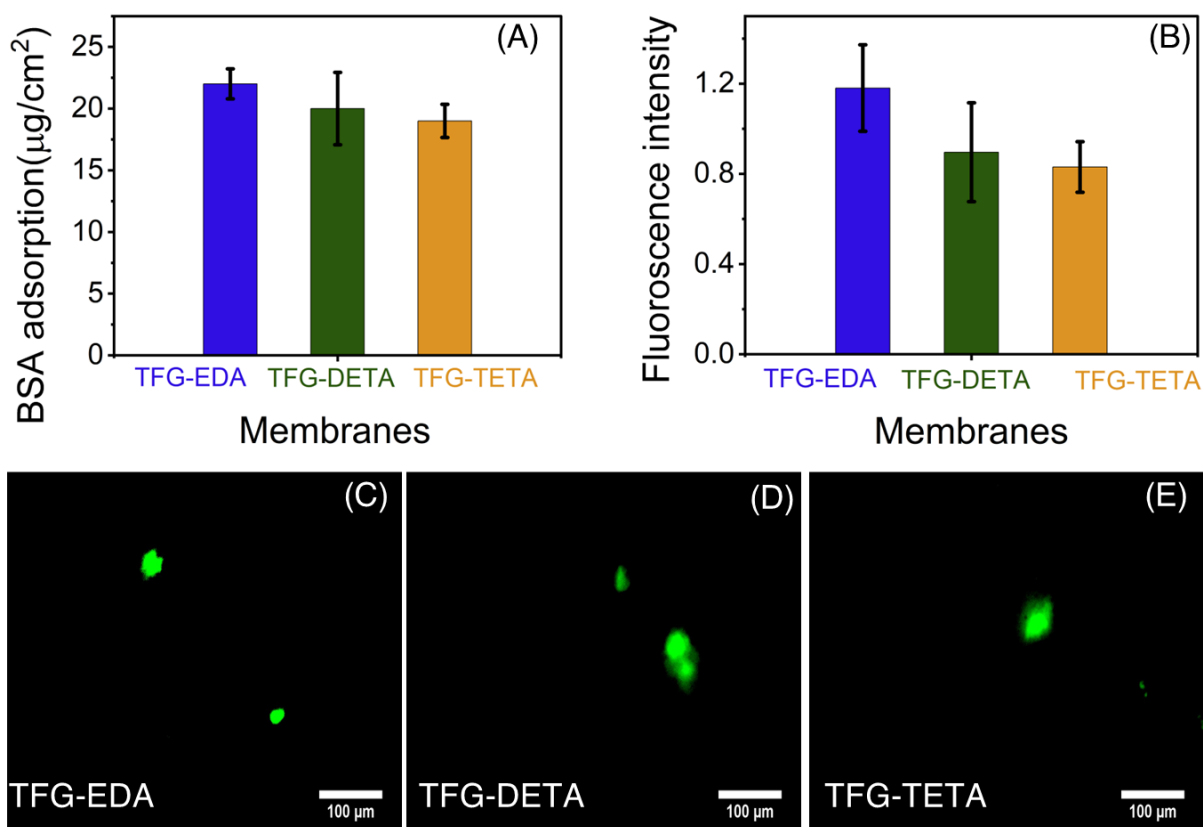

**Figure S14** | (A) static BSA adsorption, (B) fluorescence intensity of FITC-BSA adsorbed on the membrane surface, (C-E) Fluorescence images of adsorbed FITC-BSA on different membranes.

### S10: Additional information about Atomic force microscopy

COFs are a class of crystalline porous materials in which the individual linkers are covalently bonded, making the COF membranes mechanically stable. To elucidate the nanomechanical properties of interracially crystallized COF thin films, we have performed AFM-based nanoindentation experiments by transferring the COF-x films with a thickness of  $\sim 105$  nm onto a cleaned Si wafer. Prior to indenting, the COF thin films were scanned in noncontact mode, and the tip was placed on a smoother surface. During the AFM nanoindentation experiment, we applied force on the tip and allowed for the nano penetration of the tip on the film's surface, subsequently measuring how the sample responded as a function of indentation. In general, the behavior of a polymer sample during a nanoindentation experiment is represented schematically in **Figure S15 (Supp. Info.)**. Typically, DMT (Derjaguin–Muller–

Toporov) and JKR (Johnson–Kendall–Roberts) models are used to calculate the elastic modulus when adhesion occurs between the sample and tip surface.<sup>4</sup> The JKR model accounts for adhesion forces within the contact area, whereas the DMT model considers adhesive forces away from the contact area.<sup>5</sup> Hence, the JKR model may be more appropriate for calculating the modulus for a sample displaying strong adhesive properties. The JKR model calculates the modulus using locations on the unloading portions of the force-separation curve. The elastic modulus of the COF membrane was calculated using the following equation,

$$E = \frac{3}{4} (1 - \nu^2) \left( \frac{1+16\frac{1}{3}}{3} \right)^{3/2} \frac{F_a}{(R(d_0-d_1)^3)^{1/2}} \quad (\text{S9})$$

there the  $\nu$  is the Poisson's ratio (0.27),  $R$  is the tip radius (10 nm), and the values of  $F_a$ ,  $d_0$  and  $d_1$  can be obtained from the force-displacement curve (**Figure S15**).

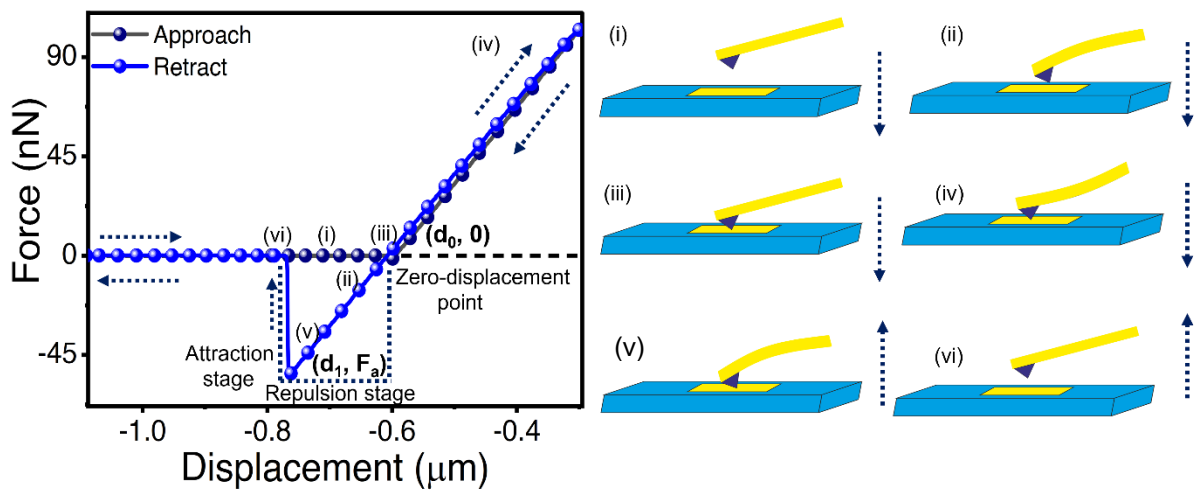

**Figure S15** | Force versus displacement graphs show an approach and retract curve for TFG-DETA membrane, and the schematics represent the relative positions of the tip and the sample during different stages of the AFM nanoindentation process. Initially, the AFM tip was positioned at a longer distance from the sample surface. Subsequently, the tip was moved towards the sample surface (I) from the initial position, and this movement measured the gradual increase in negative force (adhesion). When the adhesion approaches its local maximum, a sudden jump in the phenomenon can be observed at a certain displacement value (II). This jump can be attributed to the bending of the AFM cantilever towards the sample surface during maximal adhesion. Eventually, the cantilever bending towards the sample reduces within displacement until there is an absence of negative load. This point corresponds to the zero displacement point, which assures a strong tip-to-surface contact (III), and the

indentation stage begins from this point (IV). When the cantilever bends away from the sample surface during the indentation phase, the tip experiences a positive force.

### S11. Molecular weight cut-off analysis

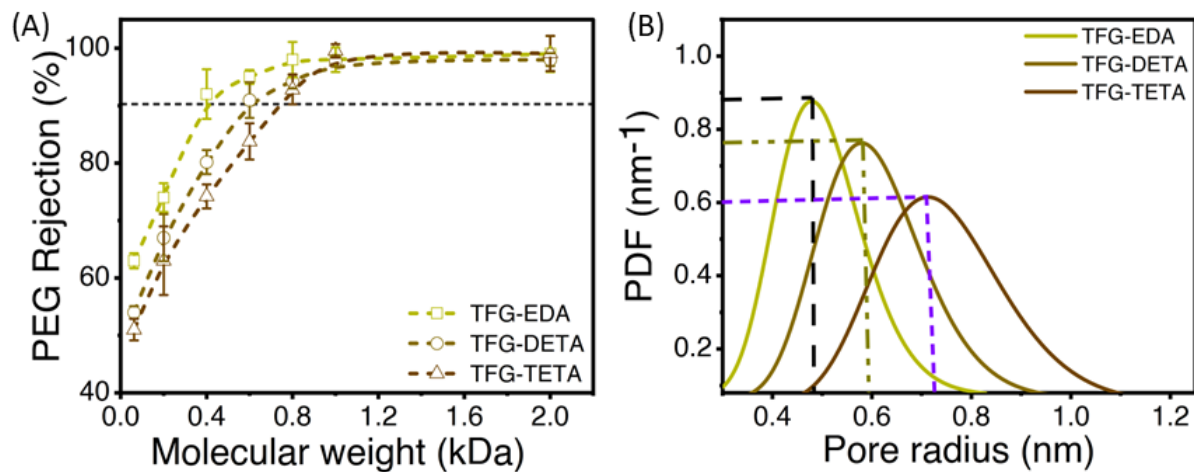

**Figure S16** (A) Rejection of different molecular weight PEG by different COF membranes, and (B) log-normal plot for pore size distribution.

## S12: Additional information for OSN performance

### S12.1. Stability test of COF membranes

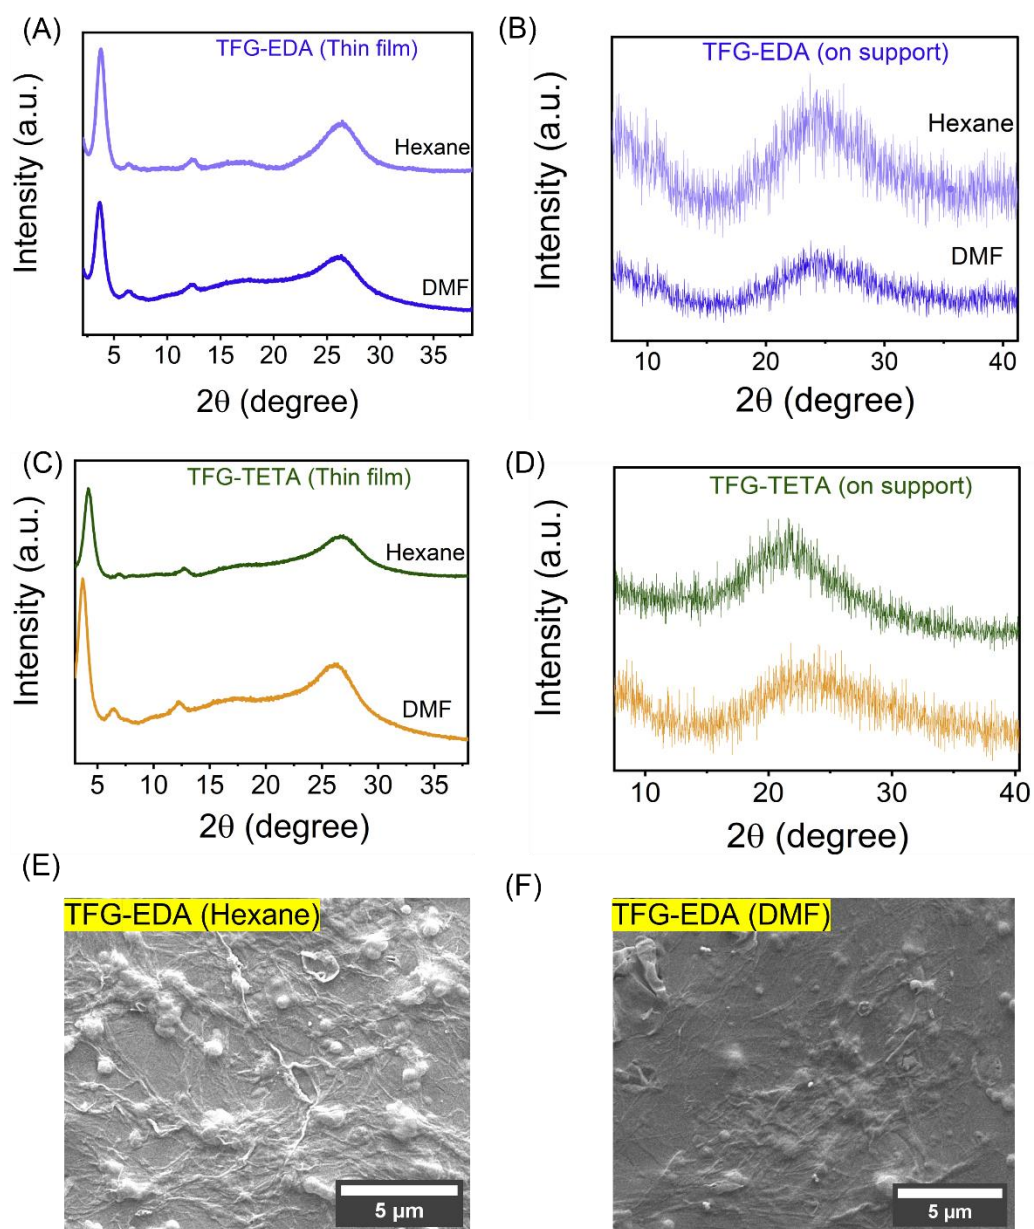

**Figure S17** | Stability test of COF thin films or membranes under polar (DMF) and nonpolar (hexane) solvent. The COF membranes were immersed in the solvents for 48 h, followed by drying under vacuum before the characterization.

*S12.2: Effect of COF layer thickness on solvent flux*

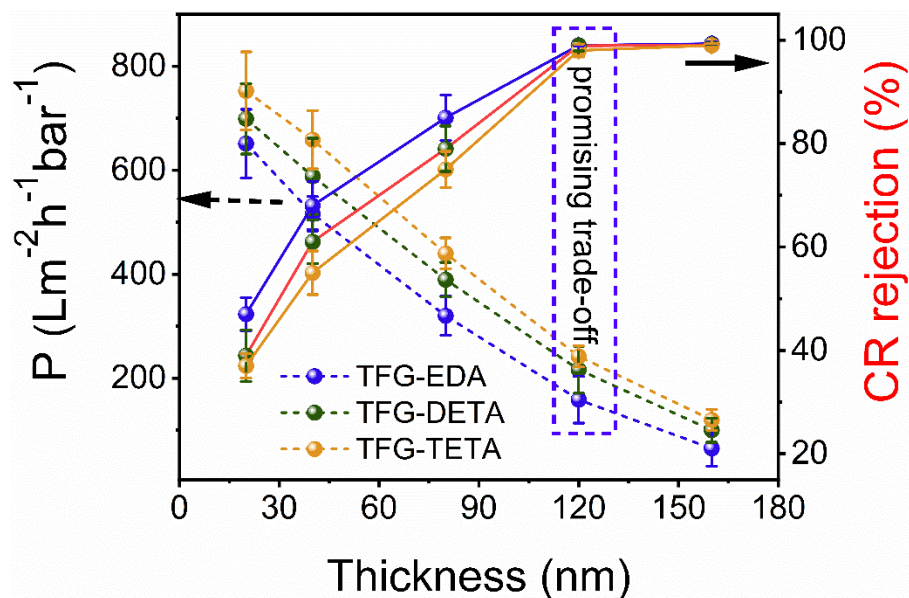

**Figure S18** Effect of COF layer thickness on the pure water permeance and Congo red (CR) rejection.

*S12.3: Effect of pressure on water flux and membrane morphology after filtration*

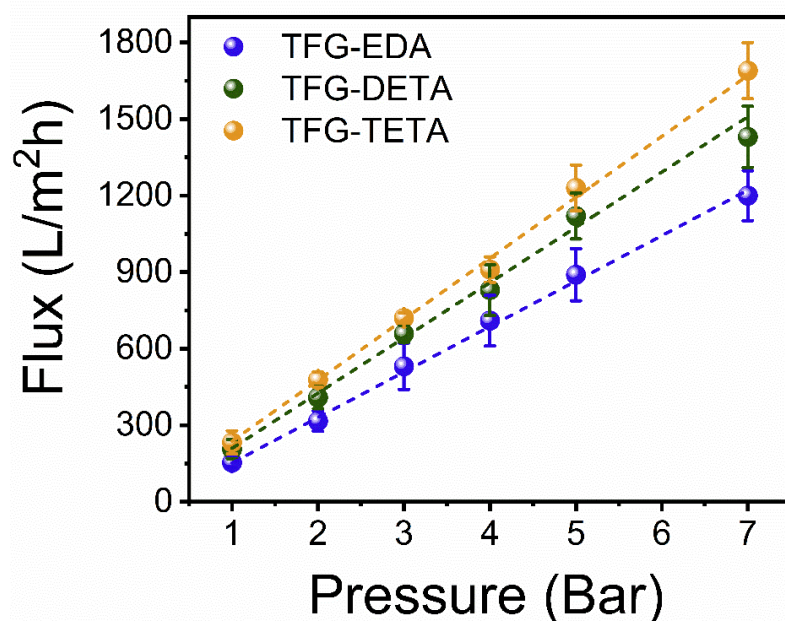

**Figure S19** Effect of pressure on water flux through COF membranes.



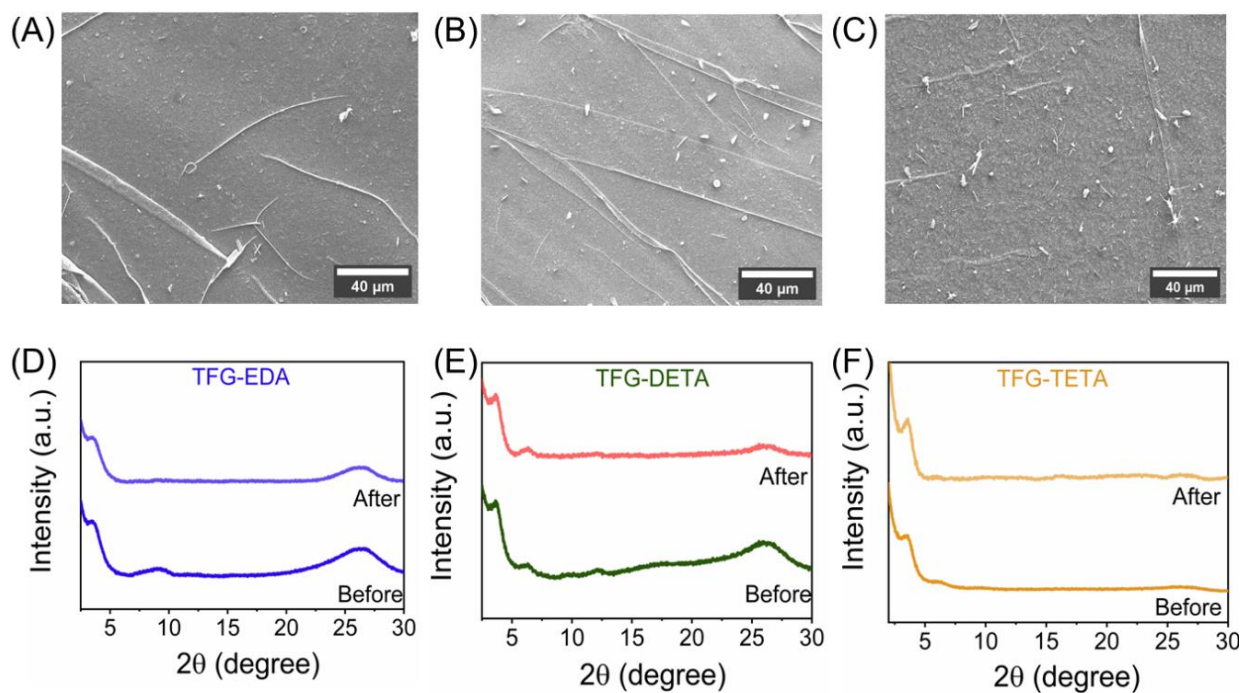

**Figure S20** | FESEM images and PXRD spectra after pressure-dependent filtration test (A) TFG-EDA, (B) TFG-DETA, and (C) TFG-TETA. (low magnification images were taken to visualize the surface phenomenon over a large area), (D-F) PXRD spectra of COF film before and after pressure filtration test.

*S12.2: Effect of pressure on solvent flux*

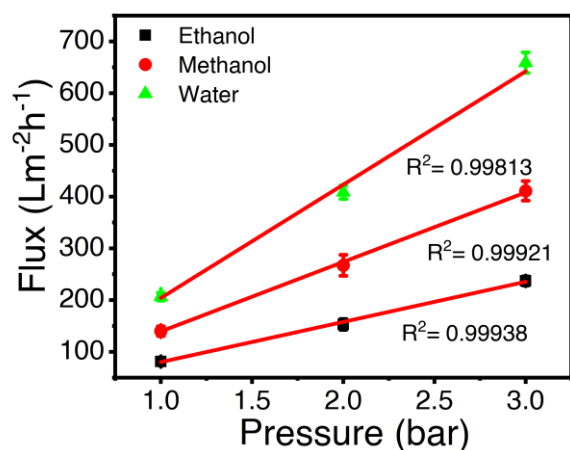

**Figure S21** | Solvent flux as a function of applied pressure for TFG-DETA membrane.

**S12.3: Plots of permeances of different solvents of COF membranes based on different models**

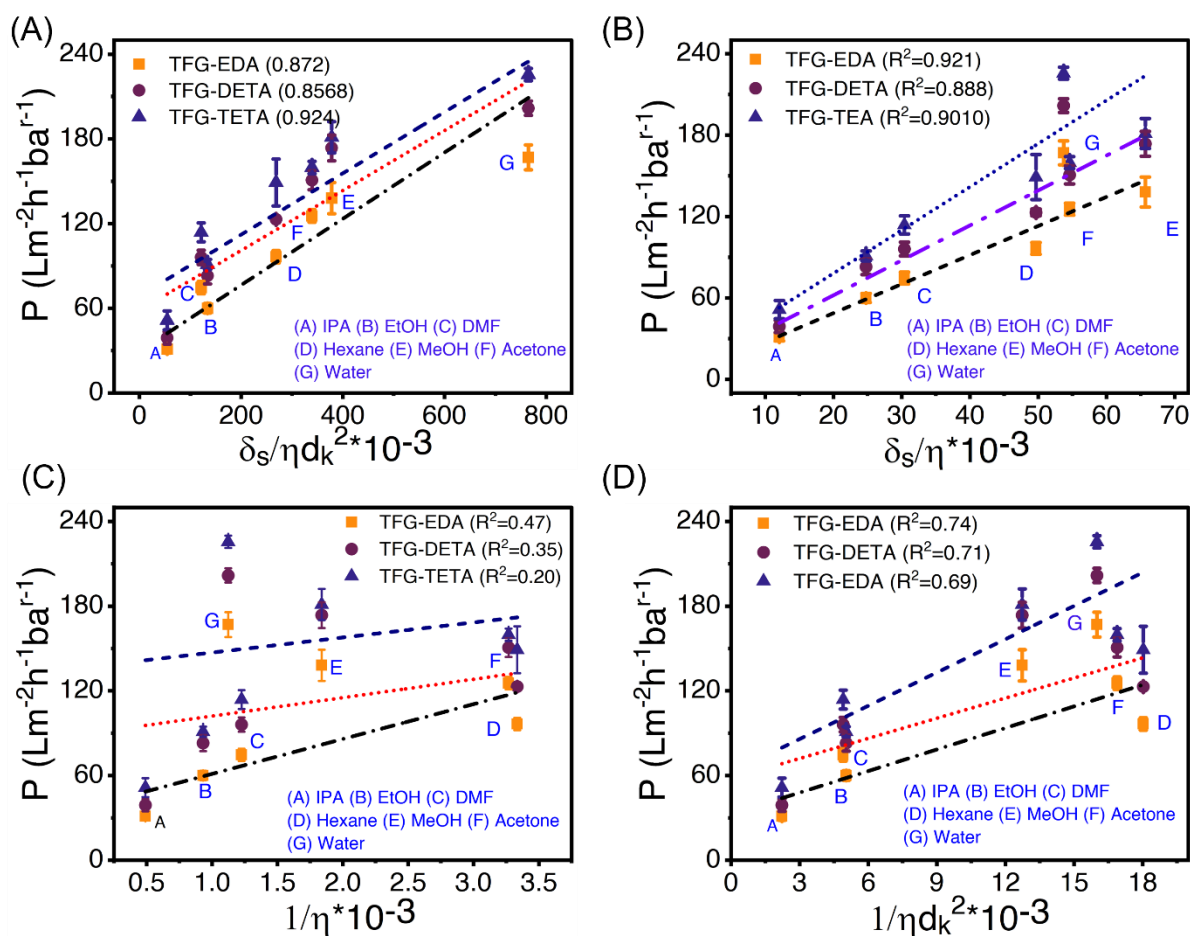

**Figure S22** | Plots of permeances of different solvents of COF membrane based on different models: (A) permeance versus solvent viscosity ( $\eta$ ) and total Hansen solubility parameter ( $\delta_s$ ); (B) permeance versus solvent viscosity ( $\eta$ ), kinetic diameter ( $d_k$ ) and total Hansen solubility parameter ( $\delta_s$ ); (C) permeance versus solvent viscosity ( $\eta$ ); (D) permeance versus solvent viscosity ( $\eta$ ) and kinetic diameter ( $d_k$ ).

**S12.4: UV-vis absorbance changes of retentate of Congo red solution**

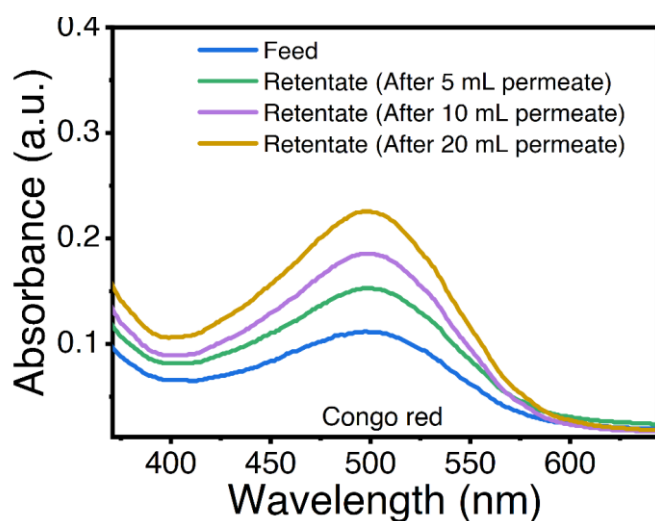

**Figure S23** | UV-vis absorbance changes of retentate of Congo red solution when the permeation volume was 5, 10 and 20 mL.

**S12.5: Permeance and rejection performance of Rhodamine-B and Orange-G**

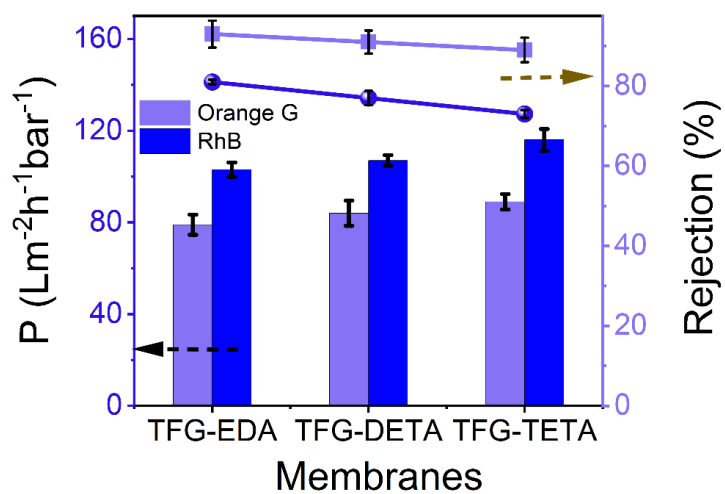

**Figure S24** | Permeance and rejection performance of Rhodamine-B (RhB) and Orange-G by COF membranes

*S12.6: Uv-visible spectra after molecular rejection experiment*

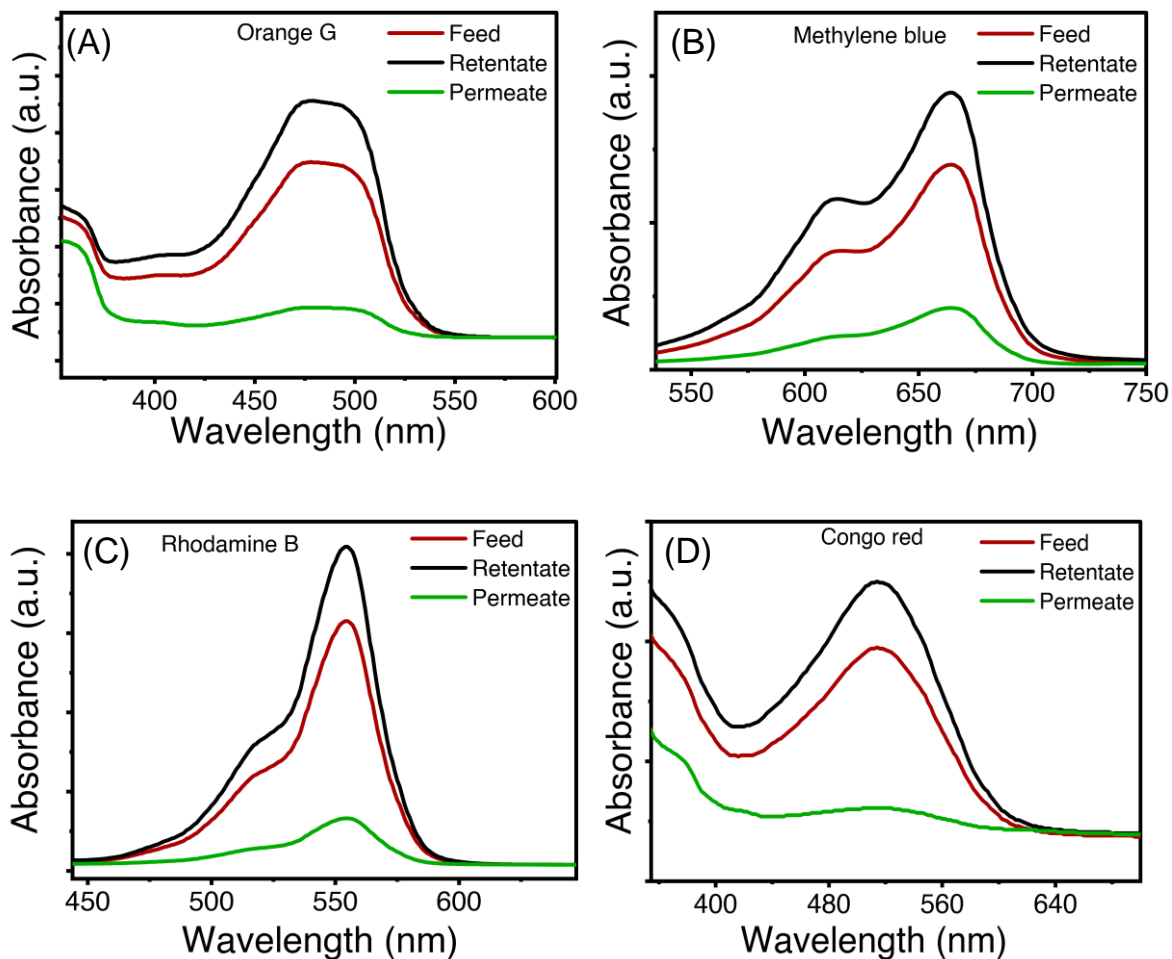

**Figure S25** | Uv-visible spectra of feed, retentate and permeate after molecular separation performance by TFG-DETA membrane.

### S12.7. Long-term dye rejection performance of COF membranes

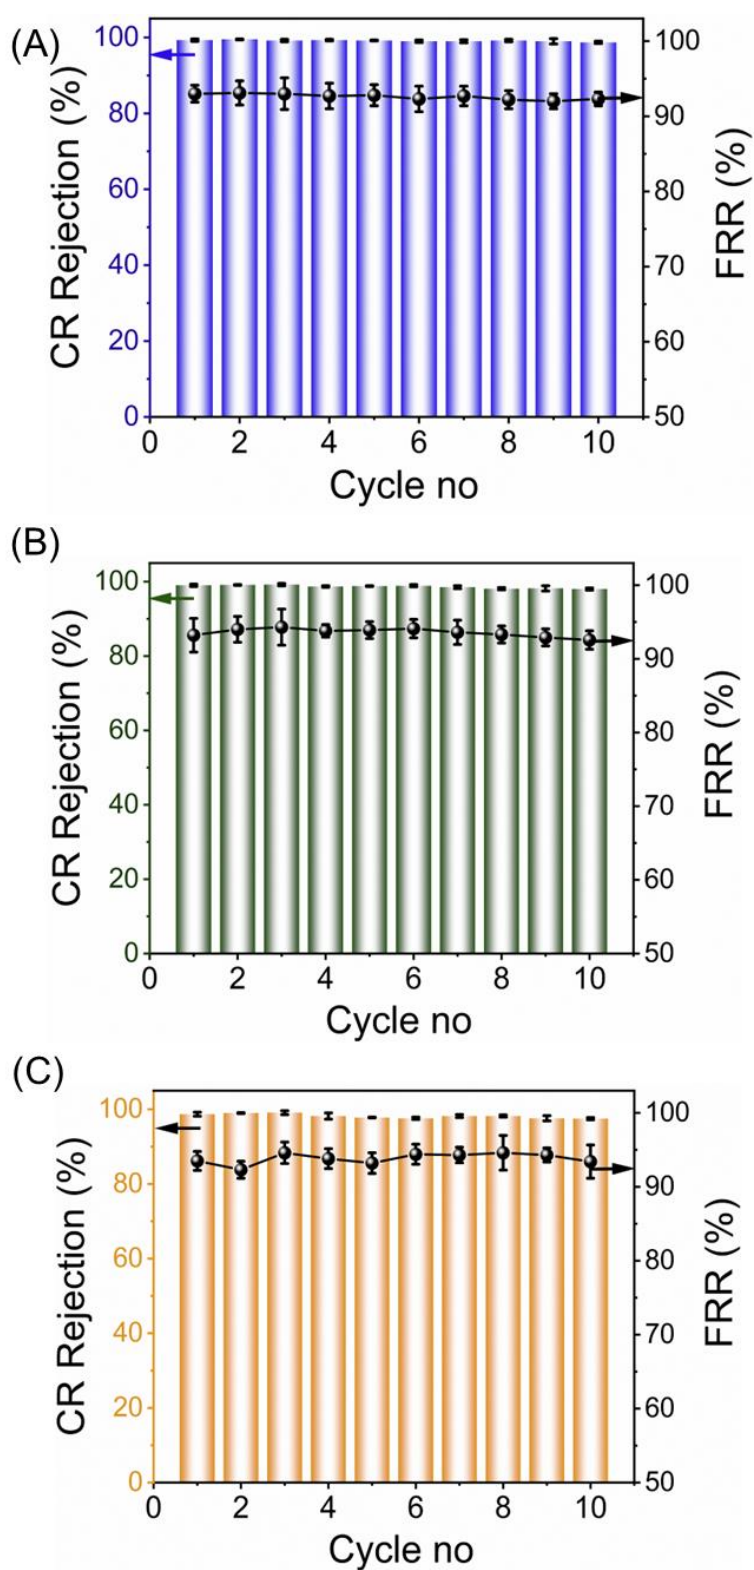

**Figure S26** | Recyclability of COF membranes towards Congo red (CR) rejection and Flux recovery (A) TFG-EDA, (B) TFG-DETA, and (C) TFG-TETA membranes.

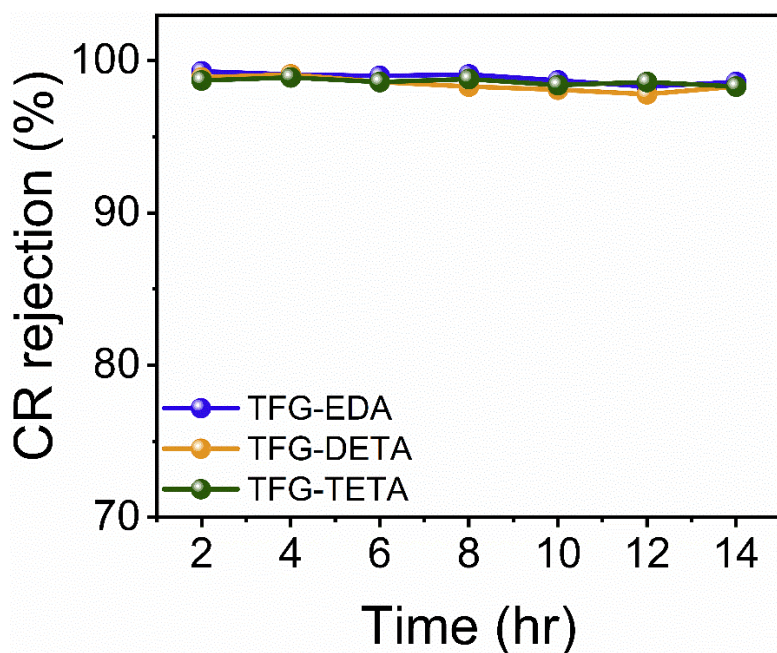

**Figure S27** | Long-term dye (Congo red) rejection performance on the COF membranes

**S13: Dynamic antifouling performance**

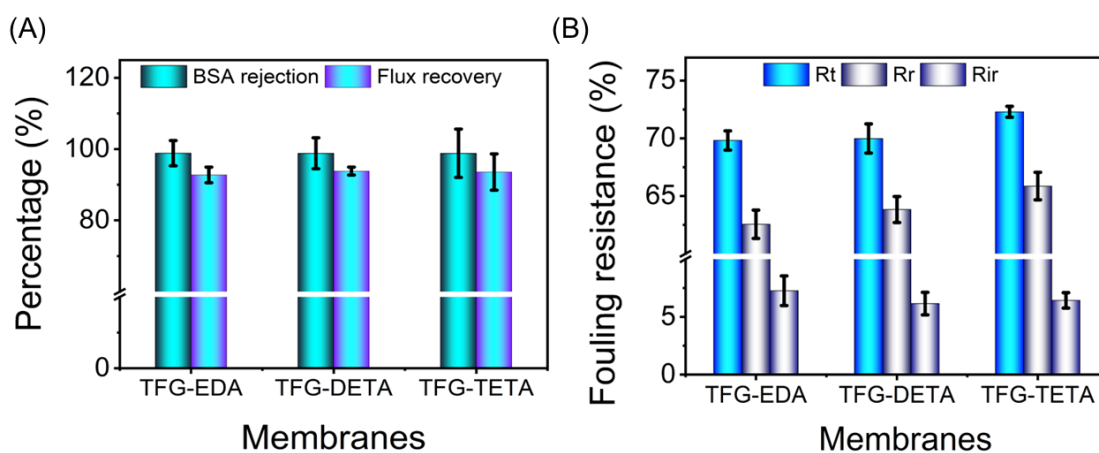

**Figure S28** | Dynamic BSA fouling experiments of COF membranes, (A) BSA rejection and flux recovery of COF membranes, (B) reversible ( $R_r$ ), irreversible ( $R_{ir}$ ), and total ( $R_t$ ) fouling on membranes during BSA filtration.

### S13: Structural Modelling and refinement of COFs

**Table S1: Fractional atomic coordinates for the unit cell of TFG-EDA**

| Space group P1, a = 19.78 Å, b = 30.54 Å, c = 3.53 Å, $\alpha$ = 92.08°, $\beta$ = 92.02°, and $\gamma$ = 121.59° |         |         |         |
|-------------------------------------------------------------------------------------------------------------------|---------|---------|---------|
| Pawley refinement Rp = 1.86%, Rwp = 2.81%                                                                         |         |         |         |
| Atom                                                                                                              | X(Å)    | Y(Å)    | Z(Å)    |
| O1                                                                                                                | 0.30734 | 0.53018 | 0.76599 |
| N2                                                                                                                | 0.46638 | 0.57492 | 0.79547 |
| C3                                                                                                                | 0.32852 | 0.60749 | 0.78443 |
| C4                                                                                                                | 0.41666 | 0.66951 | 0.80975 |
| C5                                                                                                                | 0.48389 | 0.65213 | 0.81562 |
| C6                                                                                                                | 0.53373 | 0.55995 | 0.804   |
| H7                                                                                                                | 0.40393 | 0.52897 | 0.77408 |
| O8                                                                                                                | 0.52325 | 0.81006 | 0.85382 |
| N9                                                                                                                | 0.46985 | 0.91221 | 0.87191 |
| C10                                                                                                               | 0.43735 | 0.74903 | 0.82945 |
| C11                                                                                                               | 0.36997 | 0.76577 | 0.82341 |
| C12                                                                                                               | 0.38673 | 0.84431 | 0.84283 |
| C13                                                                                                               | 0.47904 | 0.98657 | 0.88994 |
| H14                                                                                                               | 0.52326 | 0.90779 | 0.8801  |
| O15                                                                                                               | 0.21634 | 0.71823 | 0.79104 |
| N16                                                                                                               | 0.10242 | 0.56756 | 0.74214 |
| C17                                                                                                               | 0.28201 | 0.70238 | 0.79729 |
| C18                                                                                                               | 0.2611  | 0.62338 | 0.77794 |
| C19                                                                                                               | 0.17362 | 0.55853 | 0.75139 |
| C20                                                                                                               | 0.01868 | 0.50092 | 0.7145  |
| H21                                                                                                               | 0.11125 | 0.62215 | 0.75507 |
| O22                                                                                                               | 0.73396 | 0.50852 | 0.84527 |
| N23                                                                                                               | 0.57504 | 0.46393 | 0.7919  |
| C24                                                                                                               | 0.71274 | 0.43121 | 0.82009 |
| C25                                                                                                               | 0.62461 | 0.36926 | 0.78322 |
| C26                                                                                                               | 0.55744 | 0.3867  | 0.77085 |

|     |         |         |         |
|-----|---------|---------|---------|
| C27 | 0.50776 | 0.47898 | 0.78103 |
| H28 | 0.63751 | 0.50983 | 0.81522 |
| O29 | 0.51797 | 0.22874 | 0.72258 |
| N30 | 0.57085 | 0.12647 | 0.71355 |
| C31 | 0.60389 | 0.28975 | 0.75869 |
| C32 | 0.67118 | 0.27293 | 0.77125 |
| C33 | 0.65413 | 0.19426 | 0.74869 |
| C34 | 0.56135 | 0.05197 | 0.69446 |
| H35 | 0.51756 | 0.13108 | 0.70169 |
| O36 | 0.82494 | 0.32046 | 0.81923 |
| N37 | 0.93923 | 0.47212 | 0.88029 |
| C38 | 0.75922 | 0.3363  | 0.80739 |
| C39 | 0.78015 | 0.41534 | 0.83172 |
| C40 | 0.86754 | 0.48045 | 0.86762 |
| C41 | 1.02272 | 0.53927 | 0.9139  |
| H42 | 0.93094 | 0.41773 | 0.8647  |
| H43 | 0.16238 | 0.50166 | 0.738   |
| H44 | 0.33349 | 0.85129 | 0.83543 |
| H45 | 0.87831 | 0.53716 | 0.88471 |
| H46 | 0.70723 | 0.18709 | 0.75952 |

**Table S2: Fractional atomic coordinates for the unit cell of TFG-DETA**

| <b>Space group P1, a = 25.05 Å, b = 28.24 Å, c = 3.57 Å, <math>\alpha</math> = 85.9°, <math>\beta</math> = 84.27°, and <math>\gamma</math> = 110.7°</b> |         |         |         |
|---------------------------------------------------------------------------------------------------------------------------------------------------------|---------|---------|---------|
| <b>Pawley refinement Rp = 3.92%, Rwp = 5.88%</b>                                                                                                        |         |         |         |
| Atom                                                                                                                                                    | X(Å)    | Y(Å)    | Z(Å)    |
| O1                                                                                                                                                      | 0.29057 | 0.4978  | 0.9557  |
| N2                                                                                                                                                      | 0.40676 | 0.52812 | 0.86435 |
| C3                                                                                                                                                      | 0.29672 | 0.55302 | 0.94331 |
| C4                                                                                                                                                      | 0.3561  | 0.59458 | 0.94933 |
| C5                                                                                                                                                      | 0.40932 | 0.57973 | 0.96591 |
| C6                                                                                                                                                      | 0.45214 | 0.50769 | 0.96452 |



|     |         |         |         |
|-----|---------|---------|---------|
| H7  | 0.37119 | 0.50499 | 0.71646 |
| O8  | 0.42086 | 0.69096 | 0.9498  |
| N9  | 0.37285 | 0.76414 | 0.87629 |
| C10 | 0.36227 | 0.65083 | 0.9418  |
| C11 | 0.30892 | 0.66565 | 0.92325 |
| C12 | 0.31461 | 0.72208 | 0.89877 |
| C13 | 0.37758 | 0.81912 | 0.84746 |
| H14 | 0.41225 | 0.75487 | 0.87847 |
| O15 | 0.19701 | 0.63865 | 0.9151  |
| N16 | 0.12936 | 0.536   | 0.9613  |
| C17 | 0.24921 | 0.62382 | 0.9258  |
| C18 | 0.24316 | 0.56743 | 0.93572 |
| C19 | 0.18396 | 0.52473 | 0.94202 |
| C20 | 0.07206 | 0.49301 | 0.97946 |
| H21 | 0.13096 | 0.57565 | 0.96652 |
| O22 | 0.6638  | 0.35119 | 0.95409 |
| N23 | 0.54757 | 0.32184 | 0.94466 |
| C24 | 0.6572  | 0.29604 | 0.9434  |
| C25 | 0.59687 | 0.25408 | 1.00704 |
| C26 | 0.54322 | 0.26845 | 1.07405 |
| H27 | 0.58687 | 0.34824 | 0.76283 |
| O28 | 0.53049 | 0.15729 | 1.06197 |
| N29 | 0.57938 | 0.08535 | 0.95716 |
| C30 | 0.59003 | 0.19786 | 1.00039 |
| C31 | 0.64378 | 0.18357 | 0.92335 |
| C32 | 0.63791 | 0.12758 | 0.90358 |
| C33 | 0.57472 | 0.03088 | 0.93609 |
| H34 | 0.53981 | 0.09418 | 1.0117  |
| O35 | 0.75655 | 0.21113 | 0.78994 |
| N36 | 0.82525 | 0.31262 | 0.77025 |
| C37 | 0.70423 | 0.22557 | 0.86311 |
| C38 | 0.71102 | 0.28189 | 0.87616 |

|     |         |          |         |
|-----|---------|----------|---------|
| C39 | 0.77102 | 0.32461  | 0.82516 |
| C40 | 0.88332 | 0.35527  | 0.72604 |
| H41 | 0.82263 | 0.27268  | 0.76392 |
| H42 | 0.18141 | 0.48367  | 0.93779 |
| H43 | 0.27446 | 0.73216  | 0.89347 |
| H44 | 0.77446 | 0.36585  | 0.83183 |
| H45 | 0.67826 | 0.11797  | 0.84712 |
| C46 | 0.45427 | 0.45921  | 0.80385 |
| N47 | 0.47329 | 0.42259  | 1.03296 |
| C48 | 0.4967  | 0.38742  | 0.83287 |
| C49 | 0.49828 | 0.33915  | 1.0521  |
| C50 | 0.43704 | 0.86194  | 0.81929 |
| C51 | 0.93876 | 0.34324  | 0.67499 |
| C52 | 0.51504 | -0.01217 | 0.9927  |
| C53 | 0.01594 | 0.50379  | 1.01674 |

**Table S3: Fractional atomic coordinates for the unit cell of TFG-TETA**

| Space group P1, $a = 31.58 \text{ \AA}$ , $b = 33.61 \text{ \AA}$ , $c = 5.99 \text{ \AA}$ , $\alpha = 90.5^\circ$ , $\beta = 91.2^\circ$ , and $\gamma = 109.8^\circ$ |                   |                   |                    |
|------------------------------------------------------------------------------------------------------------------------------------------------------------------------|-------------------|-------------------|--------------------|
| Pawley refinement $R_p = 2.16\%$ , $R_{wp} = 2.62\%$                                                                                                                   |                   |                   |                    |
| Atom                                                                                                                                                                   | X( $\text{\AA}$ ) | Y( $\text{\AA}$ ) | Z ( $\text{\AA}$ ) |
| O1                                                                                                                                                                     | 0.24939           | 0.55466           | 0.54767            |
| N2                                                                                                                                                                     | 0.32587           | 0.52854           | 0.53897            |
| C3                                                                                                                                                                     | 0.27845           | 0.59752           | 0.46771            |
| C4                                                                                                                                                                     | 0.32937           | 0.60706           | 0.43363            |
| C5                                                                                                                                                                     | 0.35215           | 0.57375           | 0.48008            |
| C6                                                                                                                                                                     | 0.35074           | 0.49884           | 0.6054             |
| O7                                                                                                                                                                     | 0.40843           | 0.66014           | 0.31893            |
| N8                                                                                                                                                                     | 0.35963           | 0.76926           | 0.25104            |
| C9                                                                                                                                                                     | 0.35881           | 0.65094           | 0.35327            |

|     |         |         |         |
|-----|---------|---------|---------|
| C10 | 0.33816 | 0.68553 | 0.30757 |
| C11 | 0.36842 | 0.7282  | 0.21401 |
| C12 | 0.33313 | 0.77515 | 0.44772 |
| O13 | 0.26669 | 0.70963 | 0.29385 |
| N14 | 0.17376 | 0.5807  | 0.50917 |
| C15 | 0.28752 | 0.67627 | 0.34375 |
| C16 | 0.2575  | 0.63226 | 0.42276 |
| C17 | 0.20678 | 0.62406 | 0.45737 |
| C18 | 0.12652 | 0.57618 | 0.58019 |
| O19 | 0.62764 | 0.30317 | 0.25201 |
| N20 | 0.54345 | 0.31528 | 0.2195  |
| C21 | 0.60318 | 0.2568  | 0.29218 |
| C22 | 0.55108 | 0.23904 | 0.28608 |
| C23 | 0.52271 | 0.26773 | 0.23801 |
| O24 | 0.4755  | 0.17414 | 0.31633 |
| N25 | 0.55145 | 0.08352 | 0.46298 |
| C26 | 0.52634 | 0.19157 | 0.32553 |
| C27 | 0.55302 | 0.1618  | 0.37543 |
| C28 | 0.52717 | 0.11484 | 0.42669 |
| C29 | 0.52716 | 0.04096 | 0.56449 |
| O30 | 0.63165 | 0.15057 | 0.42522 |
| N31 | 0.71008 | 0.28908 | 0.30801 |
| C32 | 0.60498 | 0.17942 | 0.37842 |
| C33 | 0.63016 | 0.22672 | 0.3351  |
| C34 | 0.68228 | 0.24275 | 0.33009 |
| C35 | 0.75908 | 0.30178 | 0.24382 |
| C36 | 0.37742 | 0.48877 | 0.41245 |
| N37 | 0.40604 | 0.46342 | 0.49463 |
| C38 | 0.42103 | 0.43608 | 0.33358 |
| C39 | 0.45055 | 0.41054 | 0.41732 |
| N40 | 0.46537 | 0.38288 | 0.25755 |
| C41 | 0.49468 | 0.35827 | 0.34076 |

|     |         |          |         |
|-----|---------|----------|---------|
| C42 | 0.51447 | 0.3408   | 0.14438 |
| C43 | 0.36374 | 0.81248  | 0.59223 |
| N44 | 0.38497 | 0.85116  | 0.45252 |
| C45 | 0.08866 | 0.55095  | 0.41391 |
| N46 | 0.04294 | 0.54867  | 0.49844 |
| C47 | 0.79351 | 0.31276  | 0.44158 |
| N48 | 0.84096 | 0.32422  | 0.35552 |
| C49 | 0.51338 | 0.00464  | 0.38938 |
| N50 | 0.49577 | -0.03741 | 0.50588 |
| C51 | 0.45171 | -0.07024 | 0.43435 |
| H52 | 0.28852 | 0.51733  | 0.53757 |
| H53 | 0.18446 | 0.55253  | 0.50177 |
| H54 | 0.58002 | 0.33128  | 0.25353 |
| H55 | 0.41558 | 0.46442  | 0.67451 |
| H56 | 0.45508 | 0.38097  | 0.07836 |
| H57 | 0.04075 | 0.56607  | 0.65361 |
| H58 | 0.37522 | 0.79631  | 0.13995 |
| H59 | 0.36821 | 0.85534  | 0.29413 |
| H60 | 0.58761 | 0.09235  | 0.42355 |
| H61 | 0.69407 | 0.31358  | 0.32692 |
| H62 | 0.51696 | -0.04549 | 0.63566 |
| C63 | 0.8779  | 0.3438   | 0.54906 |
| C64 | 0.43147 | 0.88198  | 0.51539 |
| C65 | 0.00019 | 0.52284  | 0.36731 |
| H66 | 1.7697  | 1.12073  | 1.11015 |

**Table S4:** Molecular structures of the dyes used for the molecular separation experiments.

| Molecule       | Molecular structure                                                                 | $\lambda_{\max}$<br>nm | Charge | MW<br>(g/mol) | Molecular<br>size(nm)* |
|----------------|-------------------------------------------------------------------------------------|------------------------|--------|---------------|------------------------|
| 4-Nitrophenol  | 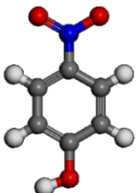   | 317                    | ----   | 139.11        | 0.71 nm ×<br>0.53 nm   |
| Methylene blue |    | 663                    | +ve    | 319           | 1.25 nm ×<br>0.51 nm   |
| Orange G       |    | 492                    | -ve    | 452.4         | 14.9 nm ×<br>7.7 nm    |
| Rhodamine B    |   | 552                    | +ve    | 479           | 1.20 nm ×<br>1.13 nm   |
| Congo red      |  | 504                    | -ve    | 696.7         | 2.56 nm ×<br>0.53 nm   |
| Brilliant blue |  | 595                    | -ve    | 826           | 2.2 nm ×<br>1.04 nm    |

\* Dimension of molecules were obtained using Materials studio and some previously reported references. <sup>6,7</sup>

**Table S5:** Performance comparison of COF membranes with previously reported organic solvent nanofiltration membranes

| Membrane       | Permeance                                              | Dye                      | Rejection | References   |
|----------------|--------------------------------------------------------|--------------------------|-----------|--------------|
|                | (L m <sup>-2</sup> h <sup>-1</sup> bar <sup>-1</sup> ) | (g mol <sup>-1</sup> )   | (%)       |              |
| TFG-EDA        | 153 (Water)                                            | Congo red (696.7)        | 99.2      | Present work |
|                | 60 (Ethanol)                                           | Brilliant blue (825.97)  | 99.5      |              |
|                |                                                        | Orange G (452.38)        | 93.4      |              |
| TFG-DETA       | 206 (Water)                                            | Congo red (696.7)        | 99.3      | Present work |
|                | 83 (Ethanol)                                           | Brilliant blue (825.97)  | 99.2      |              |
|                |                                                        | Orange G (452.38)        | 92.3      |              |
| TFG-TETA       | 232 (Water)                                            | Congo red (696.7)        | 99        | Present work |
|                | 92 (Ethanol)                                           | Brilliant blue (825.97)  | 99.2      |              |
|                |                                                        | Orange G (452.38)        | 90        |              |
| ZIF-8/PA       | 22.6 (Water)                                           | Congo red (696.7)        | 99        | 8            |
| S-rGO-18       | 103 (Water)                                            | brilliant yellow (792.7) | 86.2      | 9            |
|                | 53 (Ethanol)                                           | acid fuchsin (585.54)    | 70.1      |              |
| MPCM           | 30 (Water)                                             | Rhodamine B (479)        | 91        | 7            |
|                | 35 (Ethanol)                                           | Methyl orange (327.23)   | 83        |              |
|                |                                                        | orange G (452.4)         | 96        |              |
| TPF-DHF (M-20) | 90 (Water)                                             | Congo red (696.7)        | 82        | 10           |
|                | 60 (Ethanol)                                           | Vitamin-12 (1,355.38)    | 93        |              |
|                |                                                        | Neutral red (288.78)     | 5         |              |
| Torlon & sPPSU | 82.5                                                   | INCA (466)               | 95.5      | 11           |

|                                     |                               |                         |       |                   |
|-------------------------------------|-------------------------------|-------------------------|-------|-------------------|
|                                     |                               | RB (1018)               | 99    |                   |
|                                     |                               | AB 8(1299)              | 99.9  |                   |
| ZnO/rGO                             | 220 (Water)                   | Congo red (696.665)     | 98.5  | <sup>12</sup>     |
|                                     |                               | Methyl orange (327.23)  | 25    |                   |
|                                     |                               | Methylene blue (319.85) | 18    |                   |
| Co-Ni LDHs/PEI                      | 5.56 (Water)                  | Crystal violet (408)    | 94.4  | <sup>13</sup>     |
|                                     |                               | Methylene blue (319.85) | 85    |                   |
| PEIGO/PAA/PVA/GA                    | 0.87                          | Congo red (696.665)     | 98.53 | <sup>14</sup>     |
|                                     |                               | Methyl blue (800)       | 99.5  |                   |
| Polyimide (DuraMem®<br>150)         | 0.48 (Methanol)               | Crystal violet (408)    | 97%   | <sup>6, 15</sup>  |
| Polyarylate<br>thin film (PAR-BHPF) | 8 (Methanol)<br>8.4 (Acetone) | Crystal violet (408)    | 97    | <sup>15, 16</sup> |
| AOPIM-1                             | 249.8                         | Rhodamine-B (479.02)    | 99    | <sup>17</sup>     |
| polyamide-CD (0.65)                 | 27 (Water)<br>12 (Ethanol)    | Methyl red (269.3)      | 81    | <sup>18</sup>     |
|                                     |                               | Brilliant blue          | 99    |                   |
| Polybenzimidazole-M6                | 50 (Water)<br>47 (Ethanol)    | Mepenzolate (420)       | 90    | <sup>19</sup>     |
| TFC-8                               | 6 (Methanol)                  | Methyl orange (327.23)  | 60    | <sup>20</sup>     |
|                                     |                               | Rose Bengal (1018)      | 95    |                   |
| LNCM (Lysozyme)                     | 11 (Ethanol)                  | orange G (452.4)        | 60    | <sup>21</sup>     |
|                                     |                               | acid fuschin (585.54)   | 98    |                   |

|                                      |               |                        |      |    |
|--------------------------------------|---------------|------------------------|------|----|
| TpPa-Py                              | 183(Water)    | Saffranin O (350.85)   | 10   | 22 |
|                                      | 103 (Ethanol) | Congo red (696.665)    | 90   |    |
| 30_CO@rGO                            | Ethanol (40)  | Brilliant blue         | 96   | 23 |
|                                      |               | Rose Bengal            | 90   |    |
| MPN/ZIF-8                            | 7 (Ethanol)   | Alcian blue (1298)     | 99   | 24 |
|                                      | 22 (Methanol) | Methyl orange          | 55   |    |
| HI-templated (n6d)                   | 32 (Water)    | Methyl orange          | 98   | 25 |
|                                      | 22 (Ethanol)  |                        |      |    |
| HG-M1Si-T (Holey graphene)           | 200 (Water)   | Congo red (696.65)     | 95.2 | 26 |
|                                      |               | Rhodamine-b (479)      | 92.4 |    |
| CMP (Conjugated microporous polymer) | 12 (Ethanol)  | Brilliant blue G (854) | 99   | 27 |
|                                      |               | Rose Bengal (1,017)    | 99   |    |



## S14: References

1. J. H. Chong, M. Sauer, B. O. Patrick and M. J. MacLachlan, *Org. Lett.*, 2003, **5**, 3823-3826.
2. M. M. Bradford, *Anal. Biochem.*, 1976, **72**, 248-254.
3. J. Lin, C. Y. Tang, C. Huang, Y. P. Tang, W. Ye, J. Li, J. Shen, R. Van den Broeck, J. Van Impe, A. Volodin, C. Van Haesendonck, A. Sotto, P. Luis and B. Van der Bruggen, *J. Membr. Sci.*, 2016, **501**, 1-14.
4. A. M. Hung, M. Kazembeyki, C. G. Hoover and E. H. Fini, *ACS Sustainable Chem. Eng.*, 2019, **7**, 18005-18014.
5. O. M. McIntee, B. C. Welch, A. R. Greenberg, S. M. George and V. M. Bright, *Polymer*, 2022, **255**, 125167.
6. S. Karan, Z. Jiang and A. G. Livingston, *Science*, 2015, **348**, 1347-1351.
7. T. Huang, B. A. Moosa, P. Hoang, J. Liu, S. Chisca, G. Zhang, M. AlYami, N. M. Khashab and S. P. Nunes, *Nat. Commun.*, 2020, **11**, 5882.
8. L. Wang, M. Fang, J. Liu, J. He, L. Deng, J. Li and J. Lei, *RSC Adv.*, 2015, **5**, 50942-50954.
9. L. Huang, J. Chen, T. Gao, M. Zhang, Y. Li, L. Dai, L. Qu and G. Shi, *Adv. Mater.*, 2016, **28**, 8669-8674.
10. D. B. Shinde, G. Sheng, X. Li, M. Ostwal, A.-H. Emwas, K.-W. Huang and Z. Lai, *J. Am. Chem. Soc.*, 2018, **140**, 14342-14349.
11. G. Han, T.-S. Chung, M. Weber and C. Maletzko, *Environ. Sci. Technol.*, 2018, **52**, 3676-3684.
12. W. Zhang, H. Xu, F. Xie, X. Ma, B. Niu, M. Chen, H. Zhang, Y. Zhang and D. Long, *Nat. Commun.*, 2022, **13**, 471.
13. S. Zhao, H. Zhu, Z. Wang, P. Song, M. Ban and X. Song, *Chem. Eng. J.*, 2018, **353**, 460-471.
14. N. Wang, S. Ji, G. Zhang, J. Li and L. Wang, *Chem. Eng. J.*, 2012, **213**, 318-329.
15. M. F. Jimenez Solomon, Y. Bhole and A. G. Livingston, *J. Membr. Sci.*, 2012, **423-424**, 371-382.
16. T. Huang, T. Puspasari, S. P. Nunes and K.-V. Peinemann, *Adv. Funct. Mater.*, 2020, **30**, 1906797.
17. Z. Wang, X. Luo, Z. Song, K. Lu, S. Zhu, Y. Yang, Y. Zhang, W. Fang and J. Jin, *Nat. Commun.*, 2022, **13**, 4169.
18. C. Wu, H. Tan, W. Huang, W. Li, K. N. Dinh, C. Yan, W. Wei, L. Chen and Q. Yan, *Adv. Funct. Mater.*, 2020, **30**, 2003187.

19. F. Fei, L. Cseri, G. Szekely and C. F. Blanford, *ACS Appl. Mater. Interfaces*, 2018, **10**, 16140-16147.
20. Y. Li, J. Zhu, S. Li, Z. Guo and B. Van der Bruggen, *ACS Appl. Mater. Interfaces*, 2020, **12**, 31962-31974.
21. M.-B. Wu, F. Yang, J. Yang, Q. Zhong, V. Körstgen, P. Yang, P. Müller-Buschbaum and Z.-K. Xu, *Nano Lett.*, 2020, **20**, 8760-8767.
22. R. Shevate and D. L. Shaffer, *ACS Nano*, 2022, **16**, 2407-2418.
23. X. Sui, Y. Wang, F. Liu, Z. Yuan, C. Wang, Y. Yu, K. Zhou, K. Goh and Y. Chen, *Matter*, 2021, **4**, 2953-2969.
24. Y. Chen, Y. Bai, L. Meng, W. Zhang, J. Xia, Z. Xu, R. Sun, Y. Lv and T. Liu, *Chem. Eng. J.*, 2022, **437**, 135289.
25. Y. Zhang, D. Kim, R. Dong, X. Feng and C. O. Osuji, *Sci. Adv.*, 2022, **8**, eabm5899.
26. H. M. Hegab, M. Ouda, P. Kallem, C. Aubry, Y. Ibrahim, F. Banat and S. W. Hasan, *Chem. Eng. J.*, 2022, **450**, 138033.
27. B. Liang, H. Wang, X. Shi, B. Shen, X. He, Z. A. Ghazi, N. A. Khan, H. Sin, A. M. Khattak, L. Li and Z. Tang, *Nat. Chem.*, 2018, **10**, 961-967.
